# Supplementary material for: Cenozoic pelagic accumulation rates and biased sampling of the deep sea record
Source: Copernicus journal article supplement (doi:10.5194/egusphere-2023-3087), 2024-01-03
Supplement: Supplementary file 2 [file egusphere-2023-3087-supplement.zip]

Archive with 2 entries (2 files):
- SOM1.pdf
- SOM3 - SAR_per_LOC_section.csv
