# Supplementary material for: Cenozoic pelagic accumulation rates and biased sampling of the deep sea record
Source: Copernicus journal article supplement (doi:10.5194/egusphere-2023-3087), 2024-01-03
Supplement: Supplementary file 2 [file egusphere-2023-3087-supplement.zip › SOM3 - SAR_per_LOC_section.csv]

from	to	lsr	top	bottom	density	sar	site_hole
42.04584	43.539898	0.730761456382549	28.908	39.826	0.7637	0.558082524239353	1049A
43.539898	52.979626	0.497747392721485	39.826	86.812	0.75315	0.374878448828186	1049A
52.979626	61.808149	0.161204767773726	86.812	101.044	1.00985	0.162792634736297	1049A
61.808149	68.667233	0.551429316217734	101.044	138.867	1.2455	0.686805213349188	1049A
68.667233	74.351343	NA	138.867	138.867	1.0235	NA	1049A
74.351343	78.378608	0.237208130083319	138.867	148.42	1.371	0.325212346344231	1049A
78.378608	108.803056	NA	148.42	148.42	1.1335	NA	1049A
108.803056	122.385399	0.192345311850834	148.42	174.545	1.4534	0.279554676244003	1049A
43.48615	60.27562	0.546783192084086	25.804	117.606	NA	NA	1049B
60.27562	69.59418	NA	117.606	117.606	NA	NA	1049B
37.419355	43.13783	0.519439186146656	0	29.704	NA	NA	1049C
43.13783	52.375367	0.227192594736021	29.704	50.691	NA	NA	1049C
52.375367	71.282991	0.392312645946418	50.691	124.868	NA	NA	1049C
62.19621	62.583777	4.28313040067913	332.023	348.623	1.1172	4.78511328363873	1050C
62.583777	63.445036	2.5138779391565	348.623	370.274	1.5467	3.88821500849336	1050C
63.445036	65.038365	1.29094493353225	370.274	390.843	1.6351	2.11082406081858	1050C
65.038365	66.381048	1.15797995506012	390.843	406.391	NA	NA	1050C
66.381048	69.129704	0.990265788079702	406.391	433.61	1.6115	1.59581331749044	1050C
69.129704	70.127688	2.2781928367589	433.61	456.346	1.5568	3.54669060826625	1050C
70.127688	71.495296	1.6750413861282	456.346	479.254	1.6125	2.70100423513173	1050C
71.495296	75.33041	NA	479.254	479.254	NA	NA	1050C
75.33041	77.612747	0.569197274547974	479.254	492.245	1.4872	0.846510186707747	1050C
77.612747	92.943157	NA	492.245	492.245	NA	NA	1050C
92.943157	93.632164	1.26050969003217	492.245	500.93	NA	NA	1050C
93.632164	94.794864	NA	500.93	500.93	NA	NA	1050C
94.794864	101.512684	0.880598170239752	500.93	560.087	1.7831	1.5701945973545	1050C
101.512684	104.603325	0.922915343451405	560.087	588.611	1.67855	1.54915954975036	1050C
38.333	38.615	3.14893617021273	6.62	15.5	0.9081	2.85954893617018	1051A
38.615	39.627	3.83152173913043	15.5	54.275	0.9626	3.68822282608695	1051A
39.627	40.145	4.79054054054054	54.275	79.09	0.991	4.74742567567567	1051A
40.145	41.154	4.9207135777998	79.09	128.74	1.1221	5.52153270564916	1051A
41.154	42.294557	3.27655698049288	128.74	166.111	1.1533	3.77885316560244	1051A
42.294557	43.621724	6.32979873670758	166.111	250.118	1.2265	7.76349815057184	1051A
43.621724	45.752502	4.60174640436498	250.118	348.171	1.23825	5.69811248520493	1051A
45.752502	47.364477	1.84816762046558	348.171	377.963	1.2465	2.30374093891034	1051A
47.364477	48.846454	NA	377.963	377.963	0.99385	NA	1051A
48.846454	49.340446	3.48446938411958	377.963	395.176	1.0975	3.82420514907124	1051A
49.340446	50.120434	2.12195572239572	395.176	411.727	1.10595	2.34677693118355	1051A
50.120434	52.798392	NA	411.727	411.727	0.99995	NA	1051A
52.798392	53.516296	2.94231540707394	411.727	432.85	1.1841	3.48399567351626	1051A
53.516296	54.228369	3.54163126533373	432.85	458.069	1.4512	5.13961529225231	1051A
54.228369	57.322321	2.26816705624392	458.069	528.245	1.5799	3.58347713215977	1051A
57.322321	58.882296	1.31566210996972	528.245	548.769	1.4891	1.9591524479559	1051A
58.882296	59.27229	4.0739088293666	548.769	564.657	1.607	6.54677148879212	1051A
59.27229	62.236243	1.25082955094092	564.657	601.731	1.3174	1.64784285040957	1051A
62.236243	63.510223	1.61101430163739	601.731	622.255	1.4115	2.27394668676117	1051A
63.510223	64.706205	1.88205173656461	622.255	644.764	1.6493	3.10406792911601	1051A
38.333	38.615	3.14893617021273	6.62	15.5	NA	NA	1051B
38.615	39.627	3.83152173913043	15.5	54.275	NA	NA	1051B
39.627	40.145	4.79054054054054	54.275	79.09	NA	NA	1051B
40.145	41.154	4.9207135777998	79.09	128.74	NA	NA	1051B
41.154	42.294557	3.27655698049288	128.74	166.111	NA	NA	1051B
42.294557	43.621724	6.32979873670758	166.111	250.118	NA	NA	1051B
43.621724	45.752502	4.60174640436498	250.118	348.171	NA	NA	1051B
45.752502	47.364477	1.84816762046558	348.171	377.963	NA	NA	1051B
47.364477	48.846454	NA	377.963	377.963	NA	NA	1051B
48.846454	49.340446	3.48446938411958	377.963	395.176	NA	NA	1051B
49.340446	50.120434	2.12195572239572	395.176	411.727	NA	NA	1051B
50.120434	52.798392	NA	411.727	411.727	NA	NA	1051B
52.798392	53.516296	2.94231540707394	411.727	432.85	NA	NA	1051B
53.516296	54.228369	3.54163126533373	432.85	458.069	NA	NA	1051B
54.228369	57.322321	2.26816705624392	458.069	528.245	NA	NA	1051B
35.216421	35.505089	3.17180982997768	3.849	13.005	1.0281	3.26093768620005	1052A
35.505089	35.705901	NA	13.005	13.005	0.99475	NA	1052A
35.705901	36.195381	4.11477486312004	13.005	33.146	0.9412	3.87282610116858	1052A
36.195381	36.270686	NA	33.146	33.146	1.0574	NA	1052A
36.270686	36.571904	3.10705203540287	33.146	42.505	1.0393	3.2291591803942	1052A
36.571904	36.697412	NA	42.505	42.505	1.0574	NA	1052A
36.697412	38.60513	3.47666688682499	42.505	108.83	1.1235	3.90603524734787	1052A
38.60513	39.144813	NA	108.83	108.83	1.0574	NA	1052A
39.144813	40.3	3.56392514804963	108.83	150	1.1797	4.20436249715415	1052A
40.3	41.102734	NA	150	150	1.0548	NA	1052A
41.102734	41.378851	4.39451391982385	150	162.134	1.2623	5.54719492099364	1052A
35.226719	35.244316	2.27311473546692	1.6	2	NA	NA	1052B
35.244316	35.286754	4.35930062679631	2	3.85	NA	NA	1052B
35.286754	35.426903	1.29861789952121	3.85	5.67	NA	NA	1052B
35.426903	35.362496	-0.357104041486159	5.67	5.9	NA	NA	1052B
35.362496	35.466774	1.16994955791249	5.9	7.12	NA	NA	1052B
35.466774	35.5046	3.83334214561387	7.12	8.57	NA	NA	1052B
35.5046	35.544471	3.38591959068011	8.57	9.92	NA	NA	1052B
35.544471	35.599677	2.98880556461263	9.92	11.57	NA	NA	1052B
35.599677	35.652839	3.2918249877732	11.57	13.32	NA	NA	1052B
35.652839	35.695777	3.02762122129586	13.32	14.62	NA	NA	1052B
35.695777	35.755803	1.8158797854263	14.62	15.71	NA	NA	1052B
35.755803	35.81882	3.41177777425128	15.71	17.86	NA	NA	1052B
35.81882	35.861508	2.92822338830597	17.86	19.11	NA	NA	1052B
35.861508	35.895	4.47868147617308	19.11	20.61	NA	NA	1052B
35.895	35.936	2.6829268292685	20.61	21.71	NA	NA	1052B
35.936	35.988	4.53846153846157	21.71	24.07	NA	NA	1052B
35.988	36.011	1.47826086956501	24.07	24.41	NA	NA	1052B
36.011	36.053968	5.3760938372749	24.41	26.72	NA	NA	1052B
36.053968	36.123221	4.25974326021957	26.72	29.67	NA	NA	1052B
36.123221	36.21325	3.44333492541288	29.67	32.77	NA	NA	1052B
36.21325	36.266674	1.98412698412699	32.77	33.83	NA	NA	1052B
36.266674	36.329002	2.40662302656909	33.83	35.33	NA	NA	1052B
36.329002	36.404191	3.92344624878668	35.33	38.28	NA	NA	1052B
36.404191	36.489273	2.70327448814085	38.28	40.58	NA	NA	1052B
36.489273	36.557537	2.49033165357999	40.58	42.28	NA	NA	1052B
36.557537	36.600078	2.58574081474343	42.28	43.38	NA	NA	1052B
36.600078	36.697032	0.257854240155134	43.38	43.63	NA	NA	1052B
36.697032	36.647566	-1.11187482311076	43.63	44.18	NA	NA	1052B
36.647566	36.73496	0.686545987138681	44.18	44.78	NA	NA	1052B
36.73496	36.793227	2.83179158013966	44.78	46.43	NA	NA	1052B
36.793227	36.826245	3.63438124659295	46.43	47.63	NA	NA	1052B
36.826245	36.867032	3.9228185451245	47.63	49.23	NA	NA	1052B
36.867032	36.903935	2.57431645123737	49.23	50.18	NA	NA	1052B
36.903935	36.965116	4.33141007829194	50.18	52.83	NA	NA	1052B
36.965116	37.031353	4.68016365475483	52.83	55.93	NA	NA	1052B
37.031353	37.049692	2.72643001254196	55.93	56.43	NA	NA	1052B
37.049692	37.069865	2.97427254250735	56.43	57.03	NA	NA	1052B
37.069865	37.101959	2.18109303919729	57.03	57.73	NA	NA	1052B
37.101959	37.126717	2.42345908393262	57.73	58.33	NA	NA	1052B
37.126717	37.158811	3.1158471988533	58.33	59.33	NA	NA	1052B
37.158811	37.187236	3.34212840809164	59.33	60.28	NA	NA	1052B
37.187236	37.208326	2.60787102892353	60.28	60.83	NA	NA	1052B
37.208326	37.223915	4.1696067740077	60.83	61.48	NA	NA	1052B
37.223915	37.279849	2.28841134193869	61.48	62.76	NA	NA	1052B
37.279849	37.262427	-0.631385604408351	62.76	62.87	NA	NA	1052B
37.262427	37.310109	1.1325028312572	62.87	63.41	NA	NA	1052B
37.310109	37.328448	2.7264300125409	63.41	63.91	NA	NA	1052B
37.328448	37.395386	2.76375153126774	63.91	65.76	NA	NA	1052B
37.395386	37.467826	4.41744892324679	65.76	68.96	NA	NA	1052B
37.467826	37.533847	2.80213871343971	68.96	70.81	NA	NA	1052B
37.533847	37.570525	3.13539451442262	70.81	71.96	NA	NA	1052B
37.570525	37.598951	7.07099134595189	71.96	73.97	NA	NA	1052B
37.598951	37.637463	4.28437889489023	73.97	75.62	NA	NA	1052B
37.637463	37.655802	3.27171601504905	75.62	76.22	NA	NA	1052B
37.655802	37.675975	3.46998463292525	76.22	76.92	NA	NA	1052B
37.675975	37.694315	3.81679389312937	76.92	77.62	NA	NA	1052B
37.694315	37.732827	4.02471956792716	77.62	79.17	NA	NA	1052B
37.732827	37.75845	3.51246926589347	79.17	80.07	NA	NA	1052B
37.75845	37.865641	1.87515742926191	80.07	82.08	NA	NA	1052B
37.865641	37.836573	-0.481629283060491	82.08	82.22	NA	NA	1052B
37.836573	37.887398	1.20019675356625	82.22	82.83	NA	NA	1052B
37.887398	37.903701	3.06692019873631	82.83	83.33	NA	NA	1052B
37.903701	37.930873	3.31223318121595	83.33	84.23	NA	NA	1052B
37.930873	37.950799	2.76021278731232	84.23	84.78	NA	NA	1052B
37.950799	37.970725	4.01485496336481	84.78	85.58	NA	NA	1052B
37.970725	37.993369	2.8705175764	85.58	86.23	NA	NA	1052B
37.993369	38.015107	2.53013156684156	86.23	86.78	NA	NA	1052B
38.015107	38.035033	3.76392652815453	86.78	87.53	NA	NA	1052B
38.035033	38.064016	4.14035814097867	87.53	88.73	NA	NA	1052B
38.064016	38.0985	3.76986428488584	88.73	90.03	NA	NA	1052B
38.0985	38.137	4.15584415584424	90.03	91.63	NA	NA	1052B
38.137	38.172523	0.337809306646432	91.63	91.75	NA	NA	1052B
38.172523	38.213093	3.94380083805743	91.75	93.35	NA	NA	1052B
38.213093	38.272596	4.36952758684442	93.35	95.95	NA	NA	1052B
38.272596	38.290627	3.88220287283002	95.95	96.65	NA	NA	1052B
38.290627	38.308658	3.88220287282994	96.65	97.35	NA	NA	1052B
38.308658	38.331197	3.32756555304112	97.35	98.1	NA	NA	1052B
38.331197	38.352821	4.16204217536157	98.1	99	NA	NA	1052B
38.352821	38.392463	4.2883810100398	99	100.7	NA	NA	1052B
38.392463	38.410482	2.77484877074162	100.7	101.2	NA	NA	1052B
38.410482	38.454629	3.17122341268974	101.2	102.6	NA	NA	1052B
38.454629	38.516796	3.21714092685818	102.6	104.6	NA	NA	1052B
38.516796	38.573556	3.52360817477071	104.6	106.6	NA	NA	1052B
38.573556	38.615	2.17160505742698	106.6	107.5	NA	NA	1052B
38.615	39.158748	0.009195436121144	107.5	107.55	NA	NA	1052B
39.158748	39.200989	4.02452593451888	107.55	109.25	NA	NA	1052B
39.200989	39.218066	8.19816126954365	109.25	110.65	NA	NA	1052B
39.218066	39.252218	5.27055516514423	110.65	112.45	NA	NA	1052B
39.252218	39.318726	2.63126240452281	112.45	114.2	NA	NA	1052B
39.318726	39.353778	2.28232340522649	114.2	115	NA	NA	1052B
39.353778	39.389728	4.31154381084843	115	116.55	NA	NA	1052B
39.389728	39.433767	3.40607189082365	116.55	118.05	NA	NA	1052B
39.433767	39.45354	4.29879128104124	118.05	118.9	NA	NA	1052B
39.45354	39.471515	3.89429763560498	118.9	119.6	NA	NA	1052B
39.471515	39.47422	4.06654343806866	119.6	119.71	NA	NA	1052B
35.23376	35.244316	2.27358848048479	0	0.24	NA	NA	1052C
35.244316	35.286754	4.35930062679631	0.24	2.09	NA	NA	1052C
35.286754	35.362496	2.70655646800989	2.09	4.14	NA	NA	1052C
35.362496	35.426903	2.87235859456258	4.14	5.99	NA	NA	1052C
35.426903	35.466774	3.63672844924901	5.99	7.44	NA	NA	1052C
35.466774	35.5046	3.83334214561387	7.44	8.89	NA	NA	1052C
35.5046	35.544471	3.38591959068011	8.89	10.24	NA	NA	1052C
35.544471	35.599677	1.44911784950915	10.24	11.04	NA	NA	1052C
35.599677	35.652839	3.2918249877732	11.04	12.79	NA	NA	1052C
35.652839	35.695777	3.02762122129586	12.79	14.09	NA	NA	1052C
35.695777	35.755803	3.74837570386162	14.09	16.34	NA	NA	1052C
35.755803	35.81882	3.41177777425128	16.34	18.49	NA	NA	1052C
35.81882	35.85092	2.92834890965734	18.49	19.43	NA	NA	1052C
35.226719	35.244316	2.27311473546692	1.38	1.78	NA	NA	1052D
35.244316	35.286754	4.35930062679631	1.78	3.63	NA	NA	1052D
35.286754	35.362496	2.70655646800989	3.63	5.68	NA	NA	1052D
35.362496	35.426903	2.87235859456258	5.68	7.53	NA	NA	1052D
35.426903	35.466774	3.63672844924901	7.53	8.98	NA	NA	1052D
35.466774	35.5046	12.3988790778821	8.98	13.67	NA	NA	1052D
35.5046	35.544471	3.38591959068011	13.67	15.02	NA	NA	1052D
35.544471	35.599677	2.98880556461264	15.02	16.67	NA	NA	1052D
35.599677	35.652839	3.2918249877732	16.67	18.42	NA	NA	1052D
35.652839	35.68521	3.02740106885813	18.42	19.4	NA	NA	1052D
39.8918	39.928218	2.88318963150113	140	141.05	NA	NA	1052E
39.928218	40.450614	0.160414704553632	141.05	141.888	NA	NA	1052E
40.450614	43.46609	0.766446159743934	141.888	165	1.2916	0.989941859925266	1052E
43.46609	61.274465	NA	165	165	NA	NA	1052E
61.274465	64.9646	3.71281809473095	165	302.008	1.3813	5.12851563425186	1052E
64.9646	66.270429	NA	302.008	302.008	NA	NA	1052E
66.270429	72.027765	2.91787729602719	302.008	470	1.5753	4.59653210443163	1052E
72.027765	99.834731	NA	470	470	NA	NA	1052E
99.834731	103.556344	5.47346002929376	470	673.701	1.78	9.7427588521429	1052E
35.226719	35.244316	2.27311473546692	1.6	2	NA	NA	1052F
35.244316	35.286754	4.35930062679631	2	3.85	NA	NA	1052F
35.286754	35.362496	2.70655646800989	3.85	5.9	NA	NA	1052F
35.362496	35.426903	2.87235859456258	5.9	7.75	NA	NA	1052F
35.426903	35.466774	3.63672844924901	7.75	9.2	NA	NA	1052F
35.466774	35.5046	4.75863162903791	9.2	11	NA	NA	1052F
35.5046	35.544471	3.38591959068011	11	12.35	NA	NA	1052F
35.544471	35.599677	2.98880556461263	12.35	14	NA	NA	1052F
35.599677	35.652839	3.2918249877732	14	15.75	NA	NA	1052F
35.652839	35.695777	3.02762122129586	15.75	17.05	NA	NA	1052F
35.695777	35.755803	3.74837570386162	17.05	19.3	NA	NA	1052F
35.755803	35.81882	1.74556072170995	19.3	20.4	NA	NA	1052F
35.81882	35.861508	2.92822338830597	20.4	21.65	NA	NA	1052F
35.861508	35.895	4.47868147617308	21.65	23.15	NA	NA	1052F
35.895	35.936	2.6829268292685	23.15	24.25	NA	NA	1052F
35.936	35.988	3.26923076923079	24.25	25.95	NA	NA	1052F
35.988	36.011	4.34782608695591	25.95	26.95	NA	NA	1052F
36.011	36.053968	3.81679389313024	26.95	28.59	NA	NA	1052F
36.053968	36.123221	4.25974326021957	28.59	31.54	NA	NA	1052F
36.123221	36.21325	3.44333492541288	31.54	34.64	NA	NA	1052F
36.21325	36.266674	2.71413596885297	34.64	36.09	NA	NA	1052F
36.266674	36.329002	2.40662302656909	36.09	37.59	NA	NA	1052F
36.329002	36.404191	2.3141682958945	37.59	39.33	NA	NA	1052F
36.404191	36.489273	2.70327448814086	39.33	41.63	NA	NA	1052F
36.489273	36.557537	2.49033165357998	41.63	43.33	NA	NA	1052F
36.557537	36.600078	2.58574081474343	43.33	44.43	NA	NA	1052F
36.600078	36.647566	1.68463611859858	44.43	45.23	NA	NA	1052F
36.647566	36.697032	2.72914729309007	45.23	46.58	NA	NA	1052F
36.697032	36.73496	3.03206074667784	46.58	47.73	NA	NA	1052F
36.73496	36.793227	1.88786105342645	47.73	48.83	NA	NA	1052F
36.793227	36.826245	3.63438124659295	48.83	50.03	NA	NA	1052F
36.826245	36.867032	3.92281854512451	50.03	51.63	NA	NA	1052F
36.867032	36.903935	2.57431645123735	51.63	52.58	NA	NA	1052F
36.903935	36.965116	4.33141007829194	52.58	55.23	NA	NA	1052F
36.965116	37.031353	3.5478659963464	55.23	57.58	NA	NA	1052F
37.031353	37.049692	7.47041823436499	57.58	58.95	NA	NA	1052F
37.049692	37.069865	2.97427254250732	58.95	59.55	NA	NA	1052F
37.069865	37.101959	2.18109303919732	59.55	60.25	NA	NA	1052F
37.101959	37.126717	2.42345908393262	60.25	60.85	NA	NA	1052F
37.126717	37.158811	3.1158471988533	60.85	61.85	NA	NA	1052F
37.158811	37.187236	3.34212840809162	61.85	62.8	NA	NA	1052F
37.187236	37.208326	2.60787102892356	62.8	63.35	NA	NA	1052F
37.208326	37.223915	4.1696067740077	63.35	64	NA	NA	1052F
37.223915	37.262427	3.76506024096344	64	65.45	NA	NA	1052F
37.262427	37.279849	6.02686258753428	65.45	66.5	NA	NA	1052F
37.279849	37.310109	2.14805023132862	66.5	67.15	NA	NA	1052F
37.310109	37.328448	2.7264300125409	67.15	67.65	NA	NA	1052F
37.328448	37.395386	2.76375153126772	67.65	69.5	NA	NA	1052F
37.395386	37.467826	4.41744892324681	69.5	72.7	NA	NA	1052F
37.467826	37.533847	2.80213871343969	72.7	74.55	NA	NA	1052F
37.533847	37.570525	3.13539451442266	74.55	75.7	NA	NA	1052F
37.570525	37.598951	9.39280939984652	75.7	78.37	NA	NA	1052F
37.598951	37.637463	4.28437889489019	78.37	80.02	NA	NA	1052F
37.637463	37.655802	3.27171601504913	80.02	80.62	NA	NA	1052F
37.655802	37.675975	3.46998463292518	80.62	81.32	NA	NA	1052F
37.675975	37.732827	0.914655596988703	81.32	81.84	NA	NA	1052F
37.732827	37.694315	-0.467386788533459	81.84	82.02	NA	NA	1052F
37.694315	37.75845	1.12263194823419	82.02	82.74	NA	NA	1052F
37.75845	37.836573	2.75207045300368	82.74	84.89	NA	NA	1052F
37.836573	37.865641	3.61221962295366	84.89	85.94	NA	NA	1052F
37.865641	37.887398	3.44716642919506	85.94	86.69	NA	NA	1052F
37.887398	37.903701	3.06692019873631	86.69	87.19	NA	NA	1052F
37.903701	37.930873	3.31223318121595	87.19	88.09	NA	NA	1052F
37.930873	37.950799	2.76021278731232	88.09	88.64	NA	NA	1052F
37.950799	37.970725	4.01485496336481	88.64	89.44	NA	NA	1052F
37.970725	37.993369	2.8705175764	89.44	90.09	NA	NA	1052F
37.993369	38.015107	2.53013156684156	90.09	90.64	NA	NA	1052F
38.015107	38.035033	0.150557061126187	90.64	90.67	NA	NA	1052F
38.035033	38.064016	4.14035814097867	90.67	91.87	NA	NA	1052F
38.064016	38.0985	3.76986428488584	91.87	93.17	NA	NA	1052F
38.0985	38.137	4.15584415584424	93.17	94.77	NA	NA	1052F
38.137	38.172523	3.3780930664642	94.77	95.97	NA	NA	1052F
38.172523	38.213093	3.94380083805743	95.97	97.57	NA	NA	1052F
38.213093	38.272596	4.36952758684442	97.57	100.17	NA	NA	1052F
38.272596	38.290627	1.49742110809155	100.17	100.44	NA	NA	1052F
38.290627	38.308658	3.88220287283002	100.44	101.14	NA	NA	1052F
38.308658	38.331197	3.32756555304112	101.14	101.89	NA	NA	1052F
38.331197	38.352821	4.16204217536157	101.89	102.79	NA	NA	1052F
38.352821	38.392463	4.28838101003976	102.79	104.49	NA	NA	1052F
38.392463	38.410482	4.7172429102608	104.49	105.34	NA	NA	1052F
38.410482	38.454629	3.17122341268974	105.34	106.74	NA	NA	1052F
38.454629	38.516796	3.21714092685818	106.74	108.74	NA	NA	1052F
38.516796	38.573556	3.52360817477071	108.74	110.74	NA	NA	1052F
38.573556	38.615	2.17160505742698	110.74	111.64	NA	NA	1052F
38.615	39.158748	0.009195436121144	111.64	111.69	NA	NA	1052F
39.158748	39.200989	4.02452593451888	111.69	113.39	NA	NA	1052F
39.200989	39.218066	5.27024653042093	113.39	114.29	NA	NA	1052F
39.218066	39.252218	5.27055516514423	114.29	116.09	NA	NA	1052F
39.252218	39.318726	2.63126240452281	116.09	117.84	NA	NA	1052F
39.318726	39.353778	2.28232340522649	117.84	118.64	NA	NA	1052F
39.353778	39.389728	2.78164116828931	118.64	119.64	NA	NA	1052F
39.389728	39.433767	3.40607189082365	119.64	121.14	NA	NA	1052F
39.433767	39.45354	4.29879128104116	121.14	121.99	NA	NA	1052F
39.45354	39.471515	3.89429763560506	121.99	122.69	NA	NA	1052F
39.471515	39.504769	4.05966199554863	122.69	124.04	NA	NA	1052F
39.504769	39.538023	2.8567991820533	124.04	124.99	NA	NA	1052F
39.538023	39.553302	4.25420511813615	124.99	125.64	NA	NA	1052F
39.553302	39.582062	3.47705146036181	125.64	126.64	NA	NA	1052F
39.582062	39.607227	3.57639578780037	126.64	127.54	NA	NA	1052F
39.607227	39.64138	1.90320030451223	127.54	128.19	NA	NA	1052F
39.64138	39.65141	3.48953140578245	128.19	128.54	NA	NA	1052F
42.287234	43.432328	0.945162580539238	650.285	661.108	1.9279	1.8221789390216	1067A
43.432328	45.537824	1.32192129550472	661.108	688.941	2.1184	2.8003580723972	1067A
45.537824	48.345153	1.31089017354218	688.941	725.742	2.18	2.85774057832195	1067A
48.345153	49.379432	0.956801791392854	725.742	735.638	1.90185	1.8196934869605	1067A
49.379432	51.780436	0.193210840131879	735.638	740.277	1.75955	0.339964133754047	1067A
51.780436	53.996748	0.251183046430287	740.277	745.844	1.7411	0.437334802139772	1067A
53.996748	54.69858	0.088055261088114	745.844	746.462	NA	NA	1067A
54.69858	54.994088	2.72107692515942	746.462	754.503	NA	NA	1067A
54.994088	58.43031	2.72092431746261	754.503	848	2.71885	7.39778508053321	1067A
47.13733	47.296445	0.668070263645784	711	712.063	2.0002	1.3362741413443	1068A
47.296445	48.3245	0.668057642830397	712.063	718.931	NA	NA	1068A
48.3245	49.284017	0.429486918939424	718.931	723.052	1.9125	0.821393732471648	1068A
49.284017	51.785616	1.55936263166079	723.052	762.061	2.082	3.24659299911777	1068A
51.785616	52.60806	0.13362611922513	762.061	763.16	NA	NA	1068A
52.60806	57.097231	0.709863803361469	763.16	795.027	1.992	1.41404869629605	1068A
57.097231	59.785704	0.775086824379488	795.027	815.865	2.0588	1.59574875403249	1068A
59.785704	65.886012	0.301427403337669	815.865	834.253	1.6088	0.484936406489641	1068A
65.886012	68.954126	0.512236507509172	834.253	849.969	2.14405	1.09826068392504	1068A
68.954126	69.40591	0.449551112921204	849.969	852	NA	NA	1068A
44.010163	47.352645	0.649637006272582	718.706	740.42	1.8981	1.23307600160599	1069A
47.352645	48.357854	0.918316489406679	740.42	749.651	1.7074	1.56793357401296	1069A
48.357854	50.459654	0.857407936054815	749.651	767.672	2.08815	1.79039638167286	1069A
50.459654	52.607146	0.429803696591187	767.672	776.902	1.6272	0.69937657509318	1069A
52.607146	57.130586	0.184616132854642	776.902	785.253	1.6561	0.305742777620572	1069A
57.130586	65.885194	0.468553246473172	785.253	826.273	1.84935	0.86651894636516	1069A
65.885194	71.256988	0.391135624337045	826.273	847.284	1.8916	0.739872146995955	1069A
71.256988	76.847686	0.337471278183869	847.284	866.151	2.0709	0.698869269990974	1069A
0.002291	0.428789	1.03001655341877	0	4.393	0.905	0.93216498084399	1088B
0.428789	1.188488	1.38870789615361	4.393	14.943	0.891	1.23733873547287	1088B
1.188488	1.451717	0.54781198120268	14.943	16.385	0.9195	0.503713116715864	1088B
1.451717	1.584998	0.910857511573292	16.385	17.599	0.8705	0.79290146382455	1088B
1.584998	1.68829	1.61677574255508	17.599	19.269	0.965	1.56018859156565	1088B
1.68829	1.932	0.871527635304256	19.269	21.393	1.006	0.876756801116082	1088B
1.932	2.42	0.250204918032787	21.393	22.614	0.958	0.23969631147541	1088B
2.42	2.536	0.697413793103445	22.614	23.423	0.987	0.688347413793101	1088B
2.536	2.782732	0.85274711022486	23.423	25.527	0.955	0.814373490264741	1088B
2.782732	3.815677	0.971106883715977	25.527	35.558	0.987	0.95848249422767	1088B
3.815677	4.103063	1.06511799461352	35.558	38.619	0.943	1.00440626892055	1088B
4.103063	5.60247	0.760967502485983	38.619	50.029	1.021	0.776947820038188	1088B
5.60247	6.546888	0.913472636057339	50.029	58.656	1.108	1.01212768075153	1088B
6.546888	7.317416	1.84185389758711	58.656	72.848	1.121	2.06471821919515	1088B
7.317416	7.504842	5.93941075411095	72.848	83.98	1.093	6.49177595424327	1088B
7.504842	7.796393	3.05435412672225	83.98	92.885	1.049	3.20401747893164	1088B
7.796393	8.363877	1.32409019461341	92.885	100.399	1.088	1.4406101317394	1088B
8.363877	9.563402	1.43840270106917	100.399	117.653	1.109	1.59518859548571	1088B
9.563402	10.644	2.62669373809687	117.653	146.037	1.122	2.94715037414469	1088B
10.644	11.007	6.54600550964188	146.037	169.799	0.873	5.71466280991736	1088B
11.007	11.253358	4.47560054879482	169.799	180.825	0.8885	3.9765710876042	1088B
11.253358	12.424769	2.32813248296286	180.825	208.097	0.88	2.04875658500732	1088B
12.424769	13.294217	1.05618737405802	208.097	217.28	0.8915	0.941591043972726	1088B
0.002291	0.428789	1.03001655341877	0	4.393	NA	NA	1088C
0.428789	1.188488	1.38870789615361	4.393	14.943	NA	NA	1088C
1.188488	1.451717	0.54781198120268	14.943	16.385	NA	NA	1088C
1.451717	1.584998	0.910857511573292	16.385	17.599	NA	NA	1088C
1.584998	1.68829	1.61677574255508	17.599	19.269	NA	NA	1088C
1.68829	1.932	0.871527635304256	19.269	21.393	NA	NA	1088C
1.932	2.42	0.250204918032787	21.393	22.614	NA	NA	1088C
2.42	2.536	0.697413793103445	22.614	23.423	NA	NA	1088C
2.536	2.782732	0.85274711022486	23.423	25.527	NA	NA	1088C
2.782732	3.815677	0.971106883715977	25.527	35.558	NA	NA	1088C
3.815677	4.103063	1.06511799461352	35.558	38.619	NA	NA	1088C
4.103063	5.60247	0.760967502485983	38.619	50.029	NA	NA	1088C
5.60247	6.546888	0.913472636057339	50.029	58.656	NA	NA	1088C
6.546888	7.317416	1.84185389758711	58.656	72.848	NA	NA	1088C
7.317416	7.504842	5.93941075411095	72.848	83.98	NA	NA	1088C
7.504842	7.796393	3.05435412672225	83.98	92.885	NA	NA	1088C
7.796393	8.363877	1.32409019461341	92.885	100.399	NA	NA	1088C
8.363877	9.563402	1.43840270106917	100.399	117.653	NA	NA	1088C
9.563402	10.644	2.62669373809687	117.653	146.037	1.1365	2.98523743334709	1088C
10.644	11.007	6.54600550964188	146.037	169.799	1.145	7.49517630853995	1088C
11.007	11.253358	4.47560054879482	169.799	180.825	NA	NA	1088C
11.253358	12.424769	2.32813248296286	180.825	208.097	NA	NA	1088C
12.424769	13.294217	1.05618737405802	208.097	217.28	NA	NA	1088C
0	0.099127	17.714648884764	0	17.56	0.557	9.86705942881354	1089A
0.099127	0.125197	22.2094361334868	17.56	23.35	0.693	15.3911392405063	1089A
0.125197	0.159035	8.93965364383237	23.35	26.375	NA	NA	1089A
0.159035	0.219941	10.8363708009063	26.375	32.975	0.6345	6.87567727317506	1089A
0.219941	0.283104	7.83686651995629	32.975	37.925	0.693	5.43094849832971	1089A
0.283104	0.321453	19.3616521943206	37.925	45.35	0.635	12.2946491433936	1089A
0.321453	0.368472	9.25157914885471	45.35	49.7	0.693	6.41134435015632	1089A
0.368472	0.400406	19.1018976639319	49.7	55.8	0.7225	13.8011210621908	1089A
0.400406	0.427476	30.4765422977465	55.8	64.05	NA	NA	1089A
0.427476	0.788405	11.4288405752932	64.05	105.3	0.7155	8.17733543162229	1089A
0.788405	0.883149	13.0615131301191	105.3	117.675	0.752	9.82225787384954	1089A
0.883149	0.982405	22.7190295800758	117.675	140.225	0.767	17.4254956879181	1089A
0.982405	1.070381	13.1285805219605	140.225	151.775	0.834	10.9492361553151	1089A
1.070381	1.250846	12.4954977419444	151.775	174.325	0.809	10.108857673233	1089A
1.250846	1.595985	8.28651644699672	174.325	202.925	0.836	6.92752774968926	1089A
1.595985	1.697496	8.1271980376511	202.925	211.175	0.833	6.76995596536337	1089A
1.697496	1.780961	5.27167076019885	211.175	215.575	0.8605	4.53627268915111	1089A
0	0.099127	17.714648884764	0	17.56	0.558	9.8847740776983	1089B
0.099127	0.125197	22.2094361334868	17.56	23.35	0.649	14.4139240506329	1089B
0.125197	0.159035	8.93965364383237	23.35	26.375	0.5955	5.32356374490218	1089B
0.159035	0.219941	10.8363708009063	26.375	32.975	0.663	7.18451384100089	1089B
0.219941	0.283104	7.83686651995629	32.975	37.925	0.607	4.75697797761347	1089B
0.283104	0.321453	19.3616521943206	37.925	45.35	0.656	12.7012438394743	1089B
0.321453	0.368472	9.25157914885471	45.35	49.7	0.705	6.52236329994257	1089B
0.368472	0.400406	19.1018976639319	49.7	55.8	0.619	11.8240746539738	1089B
0.400406	0.427476	30.4765422977465	55.8	64.05	0.695	21.1811968969338	1089B
0.427476	0.788405	11.4288405752932	64.05	105.3	0.708	8.09161912730759	1089B
0.788405	0.883149	13.0615131301191	105.3	117.675	0.7515	9.81572711728448	1089B
0.883149	0.982405	22.7190295800758	117.675	140.225	0.7895	17.9366738534698	1089B
0.982405	1.070381	13.1285805219605	140.225	151.775	0.861	11.303707829408	1089B
1.070381	1.250846	12.4954977419444	151.775	174.325	0.82	10.2463081483944	1089B
1.250846	1.595985	8.28651644699672	174.325	202.925	0.84	6.96067381547725	1089B
1.595985	1.697496	8.1271980376511	202.925	211.175	0.8645	7.02596270354938	1089B
1.697496	1.780961	5.27167076019885	211.175	215.575	0.986	5.19786736955607	1089B
1.780961	1.945344	6.6320726595816	215.575	226.477	0.857	5.68368626926143	1089B
1.945344	2.223099	6.17378625047254	226.477	243.625	0.921	5.68605713668521	1089B
2.223099	2.68554	4.57896250548719	243.625	264.8	0.973	4.45533051783903	1089B
0	0.099127	17.714648884764	0	17.56	NA	NA	1089C
0.099127	0.125197	22.2094361334868	17.56	23.35	NA	NA	1089C
0.125197	0.159035	8.93965364383237	23.35	26.375	NA	NA	1089C
0.159035	0.219941	10.8363708009063	26.375	32.975	NA	NA	1089C
0.219941	0.283104	7.83686651995629	32.975	37.925	NA	NA	1089C
0.283104	0.321453	19.3616521943206	37.925	45.35	NA	NA	1089C
0.321453	0.368472	9.25157914885471	45.35	49.7	NA	NA	1089C
0.368472	0.400406	19.1018976639319	49.7	55.8	NA	NA	1089C
0.400406	0.427476	30.4765422977465	55.8	64.05	NA	NA	1089C
0.427476	0.788405	11.4288405752932	64.05	105.3	NA	NA	1089C
0.788405	0.883149	13.0615131301191	105.3	117.675	NA	NA	1089C
0.883149	0.982405	22.7190295800758	117.675	140.225	NA	NA	1089C
0.982405	1.070381	13.1285805219605	140.225	151.775	NA	NA	1089C
1.070381	1.250846	12.4954977419444	151.775	174.325	NA	NA	1089C
1.250846	1.524927	7.87103082665344	174.325	195.898	NA	NA	1089C
0	0.099127	17.714648884764	0	17.56	NA	NA	1089D
0.099127	0.125197	22.2094361334868	17.56	23.35	NA	NA	1089D
0.125197	0.159035	8.93965364383237	23.35	26.375	NA	NA	1089D
0.159035	0.219941	10.8363708009063	26.375	32.975	NA	NA	1089D
0.219941	0.283104	7.83686651995629	32.975	37.925	NA	NA	1089D
0.283104	0.321453	19.3616521943206	37.925	45.35	NA	NA	1089D
0.321453	0.368472	9.25157914885471	45.35	49.7	NA	NA	1089D
0.368472	0.400406	19.1018976639319	49.7	55.8	NA	NA	1089D
0.400406	0.427476	30.4765422977465	55.8	64.05	NA	NA	1089D
0.427476	0.788405	11.4288405752932	64.05	105.3	NA	NA	1089D
0.788405	0.894428	13.0632032672156	105.3	119.15	NA	NA	1089D
0.140547	0.146641	5.57925828683952	0	0.34	NA	NA	1090A
0.146641	0.149509	5.57880055788004	0.34	0.5	NA	NA	1090A
0.149509	0.201127	5.57944902940835	0.5	3.38	0.6845	3.81913286063001	1090A
0.201127	0.235737	5.57931233747472	3.38	5.311	0.8165	4.55550852354811	1090A
0.235737	0.263678	5.57961418703697	5.311	6.87	NA	NA	1090A
0.263678	0.266367	5.57828188917812	6.87	7.02	NA	NA	1090A
0.140547	0.146641	5.57925828683952	0	0.34	NA	NA	1090B
0.146641	0.149509	5.57880055788004	0.34	0.5	NA	NA	1090B
0.149509	0.201127	5.57944902940835	0.5	3.38	0.775	4.32407299779147	1090B
0.201127	0.235737	5.57931233747472	3.38	5.311	0.733	4.08963594336897	1090B
0.235737	0.263678	5.57961418703697	5.311	6.87	0.811	4.52506710568698	1090B
0.263678	0.427393	4.51027700577223	6.87	14.254	0.773	3.48644412546193	1090B
0.427393	0.762792	2.52415779414965	14.254	22.72	0.732	1.84768350531755	1090B
0.762792	1.050276	3.14521851650875	22.72	31.762	0.8275	2.60266832241099	1090B
1.050276	1.960643	1.37252338891897	31.762	44.257	0.863	1.18448768463707	1090B
1.960643	2.583526	1.35900321569219	44.257	52.722	0.835	1.13476768510298	1090B
2.583526	4.068862	0.877848513736959	52.722	65.761	0.9075	0.79664752621629	1090B
4.068862	4.086392	1.30633200228181	65.761	65.99	0.7785	1.01697946377639	1090B
4.086392	15.649427	NA	65.99	65.99	0.7555	NA	1090B
15.649427	16.761378	0.420162399242413	65.99	70.662	0.512	0.215123148412116	1090B
16.761378	17.231819	0.856643022185562	70.662	74.692	0.608	0.520838957488821	1090B
17.231819	17.53119	0.893206088766124	74.692	77.366	0.657	0.586836400319343	1090B
17.53119	18.087166	0.562973941321206	77.366	80.496	0.625	0.351858713325754	1090B
18.087166	18.771443	1.10686169489841	80.496	88.07	0.662	0.732742442022746	1090B
18.771443	19.79786	1.08610827762985	88.07	99.218	0.629	0.683162106629179	1090B
19.79786	20.011696	1.66669784320694	99.218	102.782	0.833	1.38835930339138	1090B
20.011696	20.695974	0.917755649019844	102.782	109.062	0.8655	0.794317514226675	1090B
20.695974	21.166415	0.757799596548768	109.062	112.627	0.504	0.381930996660579	1090B
21.166415	22.278366	1.28018231019173	112.627	126.862	0.567	0.72586336987871	1090B
22.278366	23.304782	1.35734439057848	126.862	140.794	0.619	0.840196177768079	1090B
23.304782	23.903525	1.56945467420914	140.794	150.191	0.6405	1.00523571883095	1090B
23.903525	25.357615	1.08383937720499	150.191	165.951	0.589	0.638381393173737	1090B
25.357615	25.999125	1.55461333416471	165.951	175.924	0.5635	0.876024613801812	1090B
25.999125	26.341264	0.650905041518215	175.924	178.151	0.565	0.367761348457792	1090B
26.341264	27.410447	1.25076810985584	178.151	191.524	0.5335	0.66728478660809	1090B
27.410447	27.880888	1.04051305052069	191.524	196.419	0.5375	0.55927576465487	1090B
27.880888	28.265794	2.10986578541253	196.419	204.54	0.493	1.04016383220838	1090B
28.265794	29.548814	0.628205328054122	204.54	212.6	0.745	0.468012969400321	1090B
29.548814	33.012969	NA	212.6	212.6	0.871	NA	1090B
33.012969	33.65448	2.9675251086887	212.6	231.637	0.707	2.09804025184291	1090B
33.65448	35.019652	2.9638023633652	231.637	272.098	0.4655	1.3796500001465	1090B
35.019652	36.071616	1.16772056838447	272.098	284.382	0.4615	0.538903042309433	1090B
36.071616	36.697578	1.9863825599637	284.382	296.816	0.566	1.12429252893945	1090B
36.697578	36.96709	4.11336044406188	296.816	307.902	0.765	3.14672073970734	1090B
36.96709	37.75264	2.56775507606136	307.902	328.073	0.7835	2.01183610209407	1090B
37.75264	38.230586	1.18276960158679	328.073	333.726	0.6875	0.813154101090916	1090B
38.230586	40.793315	1.11950971015663	333.726	362.416	0.767	0.858663947690139	1090B
40.793315	42.632462	2.0257217068565	362.416	399.672	0.888	1.79884087568857	1090B
0.149509	0.201127	5.57944902940835	0	2.88	NA	NA	1090C
0.201127	0.235737	5.57931233747472	2.88	4.811	NA	NA	1090C
0.235737	0.263678	5.57961418703697	4.811	6.37	NA	NA	1090C
0.263678	0.427393	2.48236264239685	6.37	10.434	NA	NA	1090C
0.427393	0.762792	2.32141419622599	10.434	18.22	NA	NA	1090C
0.762792	1.050276	3.38871032822696	18.22	27.962	NA	NA	1090C
1.050276	1.960643	1.08143199391015	27.962	37.807	NA	NA	1090C
1.960643	2.583526	1.39592828829812	37.807	46.502	NA	NA	1090C
2.583526	4.068862	1.02057716233903	46.502	61.661	NA	NA	1090C
4.068862	4.086392	1.30633200228181	61.661	61.89	NA	NA	1090C
4.086392	15.649427	NA	61.89	61.89	NA	NA	1090C
15.649427	16.761378	0.420162399242412	61.89	66.562	NA	NA	1090C
16.761378	17.02976	0.852516189610333	66.562	68.85	NA	NA	1090C
0.146641	0.149509	5.57880055788004	0	0.16	NA	NA	1090D
0.149509	0.201127	5.57944902940835	0.16	3.04	NA	NA	1090D
0.201127	0.235737	5.57931233747472	3.04	4.971	NA	NA	1090D
0.235737	0.263678	5.57961418703697	4.971	6.53	NA	NA	1090D
0.263678	0.427393	4.47362795101243	6.53	13.854	NA	NA	1090D
0.427393	0.762792	2.24985763225293	13.854	21.4	NA	NA	1090D
0.762792	1.050276	3.43740869057061	21.4	31.282	NA	NA	1090D
1.050276	1.960643	1.13855181481754	31.282	41.647	NA	NA	1090D
1.960643	2.583526	1.15832347326866	41.647	48.862	NA	NA	1090D
2.583526	4.068862	0.978162516763883	48.862	63.391	NA	NA	1090D
4.068862	4.086392	1.30633200228181	63.391	63.62	NA	NA	1090D
4.086392	15.649427	NA	63.62	63.62	NA	NA	1090D
15.649427	16.761378	0.435450842707997	63.62	68.462	NA	NA	1090D
16.761378	17.231819	0.852391692050647	68.462	72.472	NA	NA	1090D
17.231819	17.53119	0.893206088766124	72.472	75.146	NA	NA	1090D
17.53119	18.087166	0.429874670849101	75.146	77.536	NA	NA	1090D
18.087166	18.771443	1.10686169489841	77.536	85.11	NA	NA	1090D
18.771443	19.79786	1.03739513277742	85.11	95.758	NA	NA	1090D
19.79786	20.011696	1.66669784320694	95.758	99.322	NA	NA	1090D
20.011696	20.695974	1.17203826514955	99.322	107.342	NA	NA	1090D
20.695974	21.166415	0.757799596548768	107.342	110.907	NA	NA	1090D
21.166415	22.278366	1.11111011186644	110.907	123.262	NA	NA	1090D
22.278366	23.304782	1.72561612445636	123.262	140.974	NA	NA	1090D
23.304782	23.903525	1.34899280659649	140.974	149.051	NA	NA	1090D
23.903525	25.357615	0.89265451244421	149.051	162.031	NA	NA	1090D
25.357615	25.999125	1.38002525291889	162.031	170.884	NA	NA	1090D
25.999125	26.341264	0.650905041518215	170.884	173.111	NA	NA	1090D
26.341264	27.410447	1.45279152399542	173.111	188.644	NA	NA	1090D
27.410447	27.880888	0.946983787552532	188.644	193.099	NA	NA	1090D
27.880888	28.265794	2.11506185925914	193.099	201.24	NA	NA	1090D
28.265794	29.548814	0.555720097894031	201.24	208.37	NA	NA	1090D
29.548814	33.012969	NA	208.37	208.37	NA	NA	1090D
33.012969	33.13999	13.9425764243709	208.37	226.08	NA	NA	1090D
0.201127	0.235737	5.57931233747472	0	1.931	NA	NA	1090E
0.235737	0.263678	5.57961418703697	1.931	3.49	NA	NA	1090E
0.263678	0.427393	5.45093607794032	3.49	12.414	NA	NA	1090E
0.427393	0.762792	2.52415779414965	12.414	20.88	NA	NA	1090E
0.762792	1.050276	2.51909671494762	20.88	28.122	NA	NA	1090E
1.050276	1.960643	1.03749367013523	28.122	37.567	NA	NA	1090E
1.960643	2.583526	1.35900321569219	37.567	46.032	NA	NA	1090E
2.583526	4.068862	0.979509013448809	46.032	60.581	NA	NA	1090E
4.068862	4.086392	1.30633200228181	60.581	60.81	NA	NA	1090E
4.086392	15.649427	NA	60.81	60.81	NA	NA	1090E
15.649427	16.761378	0.450739286173581	60.81	65.822	NA	NA	1090E
16.761378	17.231819	0.852391692050647	65.822	69.832	NA	NA	1090E
17.231819	17.53119	0.893206088766124	69.832	72.506	NA	NA	1090E
17.53119	18.087166	0.721254154855605	72.506	76.516	NA	NA	1090E
18.087166	18.771443	0.90811177344847	76.516	82.73	NA	NA	1090E
18.771443	19.79786	0.953608523631235	82.73	92.518	NA	NA	1090E
19.79786	20.011696	1.9285807815335	92.518	96.642	NA	NA	1090E
20.011696	20.695974	1.25972192588393	96.642	105.262	NA	NA	1090E
20.695974	21.166415	0.757799596548768	105.262	108.827	NA	NA	1090E
21.166415	22.278366	1.08592914615842	108.827	120.902	NA	NA	1090E
22.278366	23.304782	1.53271188290128	120.902	136.634	NA	NA	1090E
23.304782	23.903525	1.50264804765985	136.634	145.631	NA	NA	1090E
23.903525	25.357615	1.07764993913719	145.631	161.301	NA	NA	1090E
25.357615	25.999125	1.42990756184627	161.301	170.474	NA	NA	1090E
25.999125	26.341264	0.650905041518215	170.474	172.701	NA	NA	1090E
26.341264	27.410447	1.20961519216074	172.701	185.634	NA	NA	1090E
27.410447	27.880888	0.908721816338293	185.634	189.909	NA	NA	1090E
27.880888	28.265794	2.3151107023533	189.909	198.82	NA	NA	1090E
28.265794	29.548814	0.681205281289458	198.82	207.56	NA	NA	1090E
29.548814	33.012969	NA	207.56	207.56	NA	NA	1090E
33.012969	33.65448	3.02052497930666	207.56	226.937	NA	NA	1090E
33.65448	33.96475	3.17562123311951	226.937	236.79	NA	NA	1090E
0.167748	0.287493	20.455133826047	0	24.494	0.277	5.66607206981502	1091A
0.287493	0.421246	21.8768924809163	24.494	53.755	0.3105	6.79277511532452	1091A
0.421246	0.514253	14.4290214715021	53.755	67.175	0.313	4.51628372058017	1091A
0.514253	0.771574	11.3002825264941	67.175	96.253	0.328	3.70649266869008	1091A
0.771574	0.988591	12.3681554901229	96.253	123.094	0.366	4.52674490938498	1091A
0.988591	1.069198	13.8734849330703	123.094	134.277	0.347	4.8140992717754	1091A
1.069198	1.255212	4.46633049125336	134.277	142.585	0.4215	1.88255830206329	1091A
1.255212	1.404024	7.08612208692847	142.585	153.13	0.36	2.55100395129425	1091A
1.404024	1.580738	11.9339724073927	153.13	174.219	0.411	4.90486265943841	1091A
1.580738	1.707766	29.4911358125768	174.219	211.681	0.406	11.9734011399062	1091A
1.707766	1.788455	28.8143365266641	211.681	234.931	0.41	11.8138779759323	1091A
1.788455	1.85046	11.3377953390855	234.931	241.961	0.44	4.98862994919764	1091A
1.85046	2.051976	7.13541356517595	241.961	256.34	0.474	3.3821860298934	1091A
2.051976	2.182186	12.2701789417095	256.34	272.317	0.4755	5.83447008678288	1091A
2.182186	2.349599	4.96257757760747	272.317	280.625	0.456	2.26293537538901	1091A
2.349599	2.579018	3.06382644855047	280.625	287.654	0.523	1.60238123259189	1091A
2.579018	3.388182	2.84330494189064	287.654	310.661	0.588	1.6718633058317	1091A
0.167748	0.287493	23.04396843292	0	27.594	0.2785	6.41774520856821	1091B
0.287493	0.530434	21.3171099155762	27.594	79.382	0.32	6.82147517298439	1091B
0.530434	0.777113	9.47668832774577	79.382	102.759	0.335	3.17469058979483	1091B
0.777113	1.244308	9.46135981763503	102.759	146.962	0.386	3.65208488960712	1091B
1.244308	1.588164	8.96538085710297	146.962	177.79	0.373	3.34408705969941	1091B
1.588164	1.707766	33.202622029732	177.79	217.501	0.4075	13.5300684771158	1091B
1.707766	1.920806	19.5958505444987	217.501	259.248	0.402	7.87753191888846	1091B
1.920806	2.05464	20.6763602671967	259.248	286.92	0.447	9.24233303943692	1091B
0.203617	0.287493	19.3905288759597	0	16.264	NA	NA	1091D
0.287493	0.530434	22.2267958063892	16.264	70.262	NA	NA	1091D
0.530434	0.777113	8.79969515037761	70.262	91.969	NA	NA	1091D
0.777113	1.244308	9.53199413521121	91.969	136.502	NA	NA	1091D
1.244308	1.588164	9.25038388162487	136.502	168.31	NA	NA	1091D
1.588164	1.693133	32.5524678714668	168.31	202.48	NA	NA	1091D
0.2042	0.287493	21.207064219082	0	17.664	NA	NA	1091E
0.287493	0.443021	19.0036520755105	17.664	47.22	NA	NA	1091E
0	0.36863	NA	0	0	NA	NA	1092A
0.36863	0.43	0.782141111292163	0	0.48	0.982	0.768062571288904	1092A
0.43	0.91	1.06041666666667	0.48	5.57	0.6735	0.714190625	1092A
0.91	1.06	1.11666666666667	5.57	7.245	0.5685	0.634825	1092A
1.06	1.14	2.41875	7.245	9.18	0.496	1.1997	1092A
1.14	1.25	2.31818181818182	9.18	11.73	0.601	1.39322727272727	1092A
1.25	1.59	2.5235294117647	11.73	20.31	0.467	1.17848823529412	1092A
1.59	1.71	6.31666666666667	20.31	27.89	0.549	3.46785	1092A
1.71	1.945	2.65531914893617	27.89	34.13	0.5165	1.37147234042553	1092A
1.945	2.581	1.44654088050314	34.13	43.33	0.7125	1.03066037735849	1092A
2.581	3.032	0.842572062084258	43.33	47.13	0.818	0.689223946784923	1092A
3.032	3.207	0.102857142857143	47.13	47.31	0.6305	0.064851428571429	1092A
3.207	3.33	0.650406504065037	47.31	48.11	0.835	0.543089430894306	1092A
3.33	3.596	0.845864661654135	48.11	50.36	0.964	0.815413533834586	1092A
3.596	6.033	0.613459171112023	50.36	65.31	0.9985	0.612538982355355	1092A
6.033	6.252	0.24657534246575	65.31	65.85	0.6425	0.158424657534245	1092A
6.252	6.436	0.70652173913044	65.85	67.15	0.855	0.604076086956526	1092A
6.436	6.733	0.168350168350169	67.15	67.65	1.1	0.185185185185185	1092A
6.733	7.14	0.196560196560196	67.65	68.45	0.5685	0.111744471744471	1092A
7.14	7.212	0.833333333333325	68.45	69.05	0.979	0.815833333333325	1092A
7.212	7.251	1.28205128205126	69.05	69.55	0.585	0.749999999999989	1092A
7.251	7.285	1.17647058823532	69.55	69.95	0.4795	0.564117647058835	1092A
7.285	7.454	0.769230769230769	69.95	71.25	0.94	0.723076923076923	1092A
7.454	7.489	1.14285714285715	71.25	71.65	0.4795	0.548000000000006	1092A
7.489	7.695	1.16504854368931	71.65	74.05	1.1185	1.3031067961165	1092A
7.695	7.709	5.21428571428599	74.05	74.78	0.4795	2.50025000000013	1092A
7.709	7.713	1.24999999999979	74.78	74.83	0.4795	0.599374999999899	1092A
7.713	8.108	1.2506329113924	74.83	79.77	1.113	1.39195443037974	1092A
8.108	8.771	0.707390648567119	79.77	84.46	1.006	0.711634992458521	1092A
8.771	9.105	2.69461077844312	84.46	93.46	1.156	3.11497005988024	1092A
9.105	9.301602	0.472019613228762	93.46	94.388	1.076	0.507893103834147	1092A
9.301602	9.430333	0.6851496531527	94.388	95.27	0.557	0.381628356806054	1092A
9.430333	9.647	2.23384271716504	95.27	100.11	1.161	2.59349139462861	1092A
9.647	9.721	4.16216216216217	100.11	103.19	1.146	4.76983783783784	1092A
9.721	9.786	1.84615384615386	103.19	104.39	1.115	2.05846153846156	1092A
9.786	9.937	3.09933774834437	104.39	109.07	1.103	3.41856953642384	1092A
9.937	9.984	1.95744680851062	109.07	109.99	1.197	2.34306382978721	1092A
9.984	10.086	3.63725490196078	109.99	113.7	1.15	4.1828431372549	1092A
10.086	10.089	3	113.7	113.79	0.557	1.671	1092A
10.089	10.235	3.33561643835618	113.79	118.66	1.15	3.83595890410961	1092A
10.235	10.24	2.79999999999957	118.66	118.8	0.557	1.55959999999976	1092A
10.24	10.318	3.33333333333337	118.8	121.4	1.1255	3.75166666666671	1092A
10.318	10.323	1.39999999999964	121.4	121.47	0.557	0.779799999999802	1092A
10.323	10.79	2.48394004282656	121.47	133.07	1.146	2.84659528907923	1092A
10.79	10.796	2	133.07	133.19	0.5555	1.111	1092A
10.796	11.056	1.98846153846155	133.19	138.36	1.149	2.28474230769232	1092A
11.056	11.146	2.44444444444439	138.36	140.56	1.165	2.84777777777771	1092A
11.146	11.188	2.85714285714284	140.56	141.76	0.5555	1.58714285714285	1092A
11.188	11.592	0.534653465346534	141.76	143.92	1.1785	0.63008910891089	1092A
11.592	11.657	2.21538461538467	143.92	145.36	1.205	2.66953846153853	1092A
11.657	12.049	2.08418367346939	145.36	153.53	1.185	2.46975765306122	1092A
12.049	12.174	1	153.53	154.78	1.198	1.198	1092A
12.174	12.272	1.22448979591835	154.78	155.98	1.138	1.39346938775508	1092A
12.272	12.474	0.143564356435654	155.98	156.27	0.534	0.076663366336639	1092A
12.474	12.735	1.22988505747126	156.27	159.48	1.159	1.42543678160919	1092A
12.735	12.77	2.28571428571431	159.48	160.28	0.541	1.23657142857144	1092A
12.77	12.829	0.847457627118629	160.28	160.78	0.474	0.40169491525423	1092A
12.829	12.887	0.724137931034463	160.78	161.2	0.474	0.343241379310336	1092A
12.887	13.034439	0.140397045557839	161.2	161.407	1.199	0.168336057623848	1092A
13.034439	13.183	0.197225382166235	161.407	161.7	0.474	0.093484831146795	1092A
13.183	13.202	2.10526315789475	161.7	162.1	0.474	0.997894736842113	1092A
13.202	13.215	0.53846153846149	162.1	162.17	0.474	0.255230769230746	1092A
13.215	13.363	0.324324324324337	162.17	162.65	0.474	0.153729729729736	1092A
13.363	13.608	2.02857142857142	162.65	167.62	1.185	2.40385714285713	1092A
13.608	13.739	1.8854961832061	167.62	170.09	0.474	0.893725190839693	1092A
13.739	14.07	0.477341389728093	170.09	171.67	1.006	0.480205438066461	1092A
14.07	14.163	3.55913978494624	171.67	174.98	1.043	3.71218279569893	1092A
14.163	14.609	2.43273542600898	174.98	185.83	1.051	2.55680493273543	1092A
14.609	14.775	0.867469879518069	185.83	187.27	1.024	0.888289156626503	1092A
0.29	0.43	0.782142857142857	1.385	2.48	0.567	0.443475	1092B
0.43	0.91	1.06041666666667	2.48	7.57	NA	NA	1092B
0.91	1.06	0.916666666666667	7.57	8.945	0.499	0.457416666666667	1092B
1.06	1.14	3.75625000000001	8.945	11.95	0.6115	2.296946875	1092B
1.14	1.25	2.31818181818182	11.95	14.5	0.555	1.28659090909091	1092B
1.25	1.59	2.73529411764706	14.5	23.8	0.6805	1.86136764705882	1092B
1.59	1.71	6.45833333333334	23.8	31.55	0.481	3.10645833333334	1092B
1.71	1.945	2.2468085106383	31.55	36.83	0.446	1.00207659574468	1092B
1.945	2.581	1.34905660377358	36.83	45.41	0.5775	0.779080188679245	1092B
2.581	3.032	0.842572062084258	45.41	49.21	0.533	0.449090909090909	1092B
3.032	3.116	1.07142857142857	49.21	50.11	0.752	0.805714285714284	1092B
3.116	3.207	1.42857142857143	50.11	51.41	0.533	0.761428571428572	1092B
3.207	3.33	0.650406504065043	51.41	52.21	0.953	0.619837398373986	1092B
3.33	3.596	1.27443609022556	52.21	55.6	0.533	0.679274436090226	1092B
3.596	6.033	0.510874025441116	55.6	68.05	0.884	0.451612638489946	1092B
6.033	6.252	0.593607305936073	68.05	69.35	0.533	0.316392694063927	1092B
6.252	6.436	0.70652173913044	69.35	70.65	0.888	0.627391304347831	1092B
6.436	6.733	0.168350168350169	70.65	71.15	0.533	0.08973063973064	1092B
6.733	7.14	0.196560196560196	71.15	71.95	0.533	0.104766584766584	1092B
7.14	7.212	0.833333333333325	71.95	72.55	0.533	0.444166666666662	1092B
7.212	7.251	1.28205128205126	72.55	73.05	0.533	0.683333333333323	1092B
7.251	7.285	1.17647058823532	73.05	73.45	0.533	0.627058823529424	1092B
7.285	7.454	0.769230769230769	73.45	74.75	0.533	0.41	1092B
7.454	7.489	1.05714285714287	74.75	75.12	0.533	0.563457142857147	1092B
7.489	7.695	1.16504854368931	75.12	77.52	1.078	1.25592233009708	1092B
7.695	7.709	4.35714285714306	77.52	78.13	0.533	2.32235714285725	1092B
7.709	7.713	1.25000000000014	78.13	78.18	0.533	0.666250000000077	1092B
7.713	8.108	1.2506329113924	78.18	83.12	1.151	1.43947848101266	1092B
8.108	8.771	0.736048265460029	83.12	88	1.0155	0.74745701357466	1092B
8.771	9.105	2.24850299401198	88	95.51	1.148	2.58128143712575	1092B
9.105	9.311	0.582524271844656	95.51	96.71	0.774	0.450873786407764	1092B
9.311	9.426	1.39130434782609	96.71	98.31	0.527	0.73321739130435	1092B
9.426	9.647	1.97285067873303	98.31	102.67	0.527	1.03969230769231	1092B
9.647	9.721	4.05405405405406	102.67	105.67	1.093	4.43108108108109	1092B
9.721	9.786	1.84615384615386	105.67	106.87	1.077	1.98830769230771	1092B
9.786	9.937	3.09933774834437	106.87	111.55	0.527	1.63335099337748	1092B
9.937	9.984	1.95744680851062	111.55	112.47	0.527	1.0315744680851	1092B
9.984	10.086	4.53921568627449	112.47	117.1	1.151	5.22463725490194	1092B
10.086	10.089	3	117.1	117.19	0.527	1.581	1092B
10.089	10.235	3.33561643835619	117.19	122.06	0.527	1.75786986301371	1092B
10.235	10.24	2.79999999999957	122.06	122.2	0.527	1.47559999999978	1092B
10.24	10.318	0.641025641025646	122.2	122.7	0.527	0.337820512820515	1092B
10.318	10.323	1.39999999999964	122.7	122.77	0.527	0.737799999999813	1092B
10.323	10.79	2.74518201284797	122.77	135.59	1.065	2.92361884368309	1092B
10.79	10.796	2	135.59	135.71	0.527	1.054	1092B
10.796	11.056	2.14230769230769	135.71	141.28	1.07	2.29226923076923	1092B
11.056	11.146	2.44444444444439	141.28	143.48	1.121	2.74022222222216	1092B
11.146	11.188	2.85714285714291	143.48	144.68	0.527	1.50571428571431	1092B
11.188	11.592	0.767326732673266	144.68	147.78	1.111	0.852499999999998	1092B
11.592	11.657	2.21538461538463	147.78	149.22	0.527	1.1675076923077	1092B
11.657	12.049	1.44642857142857	149.22	154.89	1.139	1.64748214285714	1092B
12.049	12.174	1	154.89	156.14	0.527	0.527	1092B
12.174	12.272	1.22448979591838	156.14	157.34	0.527	0.645306122448984	1092B
12.272	12.474	0.14356435643564	157.34	157.63	0.527	0.075658415841582	1092B
12.474	12.735	1.59386973180077	157.63	161.79	0.527	0.839969348659006	1092B
12.735	12.77	2.28571428571431	161.79	162.59	0.527	1.20457142857144	1092B
12.77	12.829	0.847457627118629	162.59	163.09	0.527	0.446610169491518	1092B
12.829	12.887	0.724137931034463	163.09	163.51	1.186	0.858827586206873	1092B
12.887	13.032	0.600000000000005	163.51	164.38	0.527	0.316200000000003	1092B
13.032	13.183	0.83443708609271	164.38	165.64	0.527	0.439748344370858	1092B
13.183	13.202	2.10526315789475	165.64	166.04	0.527	1.10947368421053	1092B
13.202	13.215	0.538461538461709	166.04	166.11	0.527	0.283769230769321	1092B
13.215	13.363	0.324324324324318	166.11	166.59	0.527	0.170918918918916	1092B
13.363	13.468	2.02857142857142	166.59	168.72	0.527	1.06905714285714	1092B
0	0.29	0.667241379310345	0	1.935	NA	NA	1092C
0.29	0.43	0.782142857142857	1.935	3.03	NA	NA	1092C
0.43	0.91	0.508333333333333	3.03	5.47	NA	NA	1092C
0.91	1.06	1.11666666666667	5.47	7.145	NA	NA	1092C
1.06	1.14	3.75625000000001	7.145	10.15	NA	NA	1092C
1.14	1.25	3.27272727272727	10.15	13.75	NA	NA	1092C
1.25	1.59	2.85	13.75	23.44	NA	NA	1092C
1.59	1.71	5.075	23.44	29.53	NA	NA	1092C
1.71	1.945	2.3063829787234	29.53	34.95	NA	NA	1092C
1.945	2.581	1.60377358490566	34.95	45.15	NA	NA	1092C
2.581	3.032	0.842572062084258	45.15	48.95	NA	NA	1092C
3.032	3.116	1.07142857142857	48.95	49.85	NA	NA	1092C
3.116	3.207	1.42857142857143	49.85	51.15	NA	NA	1092C
3.207	3.33	0.650406504065043	51.15	51.95	NA	NA	1092C
3.33	3.596	0.312030075187969	51.95	52.78	NA	NA	1092C
3.596	6.033	0.611817808781288	52.78	67.69	NA	NA	1092C
6.033	6.252	0.593607305936073	67.69	68.99	NA	NA	1092C
6.252	6.436	0.70652173913044	68.99	70.29	NA	NA	1092C
6.436	6.733	0.168350168350169	70.29	70.79	NA	NA	1092C
6.733	7.14	0.039312039312039	70.79	70.95	NA	NA	1092C
7.14	7.212	0.833333333333325	70.95	71.55	NA	NA	1092C
7.212	7.251	1.28205128205126	71.55	72.05	NA	NA	1092C
7.251	7.285	1.17647058823532	72.05	72.45	NA	NA	1092C
7.285	7.454	0.769230769230769	72.45	73.75	NA	NA	1092C
7.454	7.489	1.14285714285715	73.75	74.15	NA	NA	1092C
7.489	7.695	1.16504854368931	74.15	76.55	NA	NA	1092C
7.695	7.709	4.35714285714306	76.55	77.16	NA	NA	1092C
7.709	7.713	1.24999999999979	77.16	77.21	NA	NA	1092C
7.713	8.108	1.06582278481013	77.21	81.42	NA	NA	1092C
8.108	8.771	0.889894419306182	81.42	87.32	NA	NA	1092C
8.771	9.105	2.44910179640719	87.32	95.5	NA	NA	1092C
9.105	9.311	0.582524271844663	95.5	96.7	NA	NA	1092C
9.311	9.426	1.39130434782608	96.7	98.3	NA	NA	1092C
9.426	9.647	1.78733031674208	98.3	102.25	NA	NA	1092C
9.647	9.721	4.05405405405406	102.25	105.25	NA	NA	1092C
9.721	9.786	1.84615384615386	105.25	106.45	NA	NA	1092C
9.786	9.937	2.3841059602649	106.45	110.05	NA	NA	1092C
9.937	9.984	1.95744680851062	110.05	110.97	NA	NA	1092C
9.984	10.086	5.41176470588233	110.97	116.49	NA	NA	1092C
10.086	10.089	3	116.49	116.58	NA	NA	1092C
10.089	10.235	1.013698630137	116.58	118.06	NA	NA	1092C
10.235	10.24	2.79999999999957	118.06	118.2	NA	NA	1092C
10.24	10.318	3.33333333333335	118.2	120.8	NA	NA	1092C
10.318	10.323	1.39999999999993	120.8	120.87	NA	NA	1092C
10.323	10.79	3.26338329764455	120.87	136.11	NA	NA	1092C
10.79	10.796	1.99999999999953	136.11	136.23	NA	NA	1092C
10.796	11.056	0.642307692307699	136.23	137.9	NA	NA	1092C
11.056	11.146	2.44444444444439	137.9	140.1	NA	NA	1092C
11.146	11.188	2.85714285714291	140.1	141.3	NA	NA	1092C
11.188	11.592	0.767326732673266	141.3	144.4	NA	NA	1092C
11.592	11.657	2.21538461538463	144.4	145.84	NA	NA	1092C
11.657	12.049	1.53826530612245	145.84	151.87	NA	NA	1092C
12.049	12.174	1	151.87	153.12	NA	NA	1092C
12.174	12.272	1.22448979591835	153.12	154.32	NA	NA	1092C
12.272	12.474	0.143564356435654	154.32	154.61	NA	NA	1092C
12.474	12.735	1.26436781609195	154.61	157.91	NA	NA	1092C
12.735	12.77	2.28571428571431	157.91	158.71	NA	NA	1092C
12.77	12.829	0.847457627118629	158.71	159.21	NA	NA	1092C
12.829	12.887	0.724137931034463	159.21	159.63	NA	NA	1092C
12.887	13.032	0.600000000000005	159.63	160.5	NA	NA	1092C
13.032	13.183	0.83443708609271	160.5	161.76	NA	NA	1092C
13.183	13.202	2.10526315789475	161.76	162.16	NA	NA	1092C
13.202	13.215	0.53846153846149	162.16	162.23	NA	NA	1092C
13.215	13.363	0.324324324324337	162.23	162.71	NA	NA	1092C
13.363	13.52617	2.0285591714163	162.71	166.02	NA	NA	1092C
0	1.92504	1.89086980010805	0	36.4	NA	NA	1092D
1.92504	1.945	2.65531062124249	36.4	36.93	NA	NA	1092D
1.945	2.581	1.49685534591195	36.93	46.45	NA	NA	1092D
2.581	3.032	0.842572062084257	46.45	50.25	NA	NA	1092D
3.032	3.116	1.07142857142857	50.25	51.15	NA	NA	1092D
3.116	3.207	1.42857142857144	51.15	52.45	NA	NA	1092D
3.207	3.33	0.650406504065037	52.45	53.25	NA	NA	1092D
3.33	3.596	0.845864661654135	53.25	55.5	NA	NA	1092D
3.596	5.311957	0.555375222106382	55.5	65.03	NA	NA	1092D
0	0.085	15.6470588235294	0	13.3	0.247	3.86482352941176	1093A
0.085	0.288327	26.3024586011695	13.3	66.78	0.289	7.601410535738	1093A
0.288327	0.430313	53.3418787767808	66.78	142.518	0.333	17.762845632668	1093A
0.430313	0.780546	14.7050677691708	142.518	194.02	0.381	5.60263082005408	1093A
0.780546	0.908334	7.45375152596486	194.02	203.545	0.469	3.49580946567752	1093A
0.908334	1.140245	16.9638352643902	203.545	242.886	0.4415	7.48953326922828	1093A
1.140245	1.499042	15.8680256523884	242.886	299.82	0.4195	6.65663676117693	1093A
0	0.085	9.64705882352941	0	8.2	NA	NA	1093B
0.085	0.288327	25.7417853998731	8.2	60.54	NA	NA	1093B
0.288327	0.430313	52.4403814460581	60.54	134.998	0.324	16.9906835885228	1093B
0.430313	0.780546	14.7564621266414	134.998	186.68	NA	NA	1093B
0.780546	0.908334	6.65555451216076	186.68	195.185	NA	NA	1093B
0.908334	1.075356	15.9948988755972	195.185	221.9	NA	NA	1093B
0	0.085	7.55294117647059	0	6.42	NA	NA	1093C
0.085	0.288327	26.5975497597466	6.42	60.5	NA	NA	1093C
0.288327	0.430313	53.6376825884242	60.5	136.658	NA	NA	1093C
0.430313	0.628951	12.8787039740634	136.658	162.24	NA	NA	1093C
0.424386	0.430313	57.3308587818456	136	139.398	NA	NA	1093D
0.430313	0.780546	15.5559299095174	139.398	193.88	NA	NA	1093D
0.780546	0.908334	7.40679876044699	193.88	203.345	NA	NA	1093D
0.908334	1.140245	16.2566674284532	203.345	241.046	NA	NA	1093D
1.140245	1.585135	15.1300321427769	241.046	308.358	0.351	5.31064128211468	1093D
1.585135	1.977964	32.125428621614	308.358	434.556	0.474	15.227453166645	1093D
1.977964	2.167279	17.9980455854	434.556	468.629	0.533	9.5929582970182	1093D
2.167279	2.574306	2.94550484365902	468.629	480.618	0.595	1.75257538197711	1093D
2.574306	3.596607	6.54259361968736	480.618	547.503	0.551	3.60496908444773	1093D
3.596607	3.951573	4.62156938974437	547.503	563.908	0.633	2.92545342370818	1093D
0	0.085	15.1647058823529	0	12.89	NA	NA	1093E
0.085	0.188585	24.2313076217599	12.89	37.99	NA	NA	1093E
0.133236	0.465371	23.747572523221	0.474	79.348	0.322	7.64671835247716	1094A
0.465371	0.780829	5.88921504606001	79.348	97.926	0.38	2.23790171750281	1094A
0.780829	1.025414	10.1273585869943	97.926	122.696	0.3715	3.76231371506838	1094A
1.025414	1.5257	6.51487349236237	122.696	155.289	0.416	2.71018737282274	1094A
0.1579	0.288791	29.365655392655	0	38.437	NA	NA	1094C
0.288791	0.3855	29.7211221292744	38.437	67.18	NA	NA	1094C
0.263	0.288791	30.4641153890892	28.6	36.457	NA	NA	1094D
0.288791	0.429302	31.1320821857363	36.457	80.201	NA	NA	1094D
0.429302	0.779792	4.85234956774801	80.201	97.208	NA	NA	1094D
0.779792	1.250268	9.03978098776559	97.208	139.738	NA	NA	1094D
1.250268	1.589706	7.02779299901601	139.738	163.593	0.488	3.42956298351982	1094D
0	0.533299	1.47253229426644	0	7.853	0.7109	1.04682320799401	1095A
0.533299	0.674487	4.05487718502989	7.853	13.578	0.9681	3.92552660282744	1095A
0.674487	0.785866	3.48000969662145	13.578	17.454	0.8167	2.84212391923074	1095A
0.785866	0.988715	2.83955060167908	17.454	23.214	1.0297	2.92388525454895	1095A
0.988715	1.080196	7.60923033198151	23.214	30.175	1.0328	7.85881308687051	1095A
1.080196	1.784202	4.32979264381269	30.175	60.657	1.0744	4.65192921651236	1095A
1.784202	3.02715	1.83450956918552	60.657	83.459	1.1295	2.07207855839504	1095A
2.157258	3.58871	0.852630755344922	89.432	101.637	1.12325	0.957717495941184	1095B
3.58871	4.183468	4.00179568833038	101.637	125.438	1.1079	4.43358944310122	1095B
4.183468	4.284274	9.68692339741687	125.438	135.203	1.1177	10.8270742812928	1095B
4.284274	4.647177	3.53152219739159	135.203	148.019	1.12885	3.98655883252549	1095B
4.647177	5.010081	4.70840773317462	148.019	165.106	1.1936	5.61995547031722	1095B
5.010081	5.231855	5.50380116695373	165.106	177.312	1.0928	6.01455391524704	1095B
5.231855	6.048387	3.88655925303601	177.312	209.047	1.1869	4.61295717742844	1095B
6.048387	6.25	5.14550153015926	209.047	219.421	0.9954	5.12183222312053	1095B
6.25	6.431452	11.0993540991557	219.421	239.561	1.1411	12.6654729625466	1095B
6.431452	6.733871	6.05385243652021	239.561	257.869	1.19205	7.21649479695391	1095B
6.733871	7.137097	8.47564393169091	257.869	292.045	1.1782	9.98600368031823	1095B
7.137097	7.197581	20.1788902850341	292.045	304.25	1.14235	23.0513553171087	1095B
7.197581	7.550403	5.01641054129277	304.25	321.949	1.1301	5.66904555271496	1095B
7.550403	7.641129	4.0352269470714	321.949	325.61	1.1472	4.62921235368031	1095B
7.641129	7.701613	10.0902718074202	325.61	331.713	1.21835	12.2934826565704	1095B
7.701613	8.114919	5.61109686285705	331.713	354.904	1.20675	6.77119113925274	1095B
8.114919	8.780242	8.53059341101993	354.904	411.66	1.17195	9.9974289480448	1095B
8.780242	9.102823	10.5945483459968	411.66	445.836	1.1523	12.2080980590921	1095B
9.102823	9.314516	6.34220309599282	445.836	459.262	1.1321	7.18000812497347	1095B
0	0.205279	1.66992239829695	0	3.428	NA	NA	1095D
0.205279	0.777126	2.56974330546457	3.428	18.123	NA	NA	1095D
0.777126	1.774194	3.89792872702764	18.123	56.988	NA	NA	1095D
1.774194	3.40176	0.54652161571328	56.988	65.883	NA	NA	1095D
57.302053	59.365103	2.42475945808391	32.007	82.031	0.4154	1.00724507888806	1121B
59.365103	62.954545	1.42013716895272	82.031	133.006	0.5655	0.803087569042764	1121B
0	0.512241	2.53962490312177	0	13.009	NA	NA	1138A
0.512241	1.006094	3.73896685855913	13.009	31.474	0.5147	1.92444624210038	1138A
1.006094	1.069139	0.975493694979774	31.474	32.089	NA	NA	1138A
1.069139	1.274912	7.86351950936226	32.089	48.27	0.5047	3.96871829637513	1138A
1.274912	1.983293	1.34772107100557	48.27	57.817	0.3941	0.531136874083297	1138A
1.983293	2.498161	2.34293061522565	57.817	69.88	0.6599	1.54609991298741	1138A
2.498161	3.055059	0.840010199354283	69.88	74.558	0.70385	0.591241178815512	1138A
3.055059	3.34927	1.50606197592884	74.558	78.989	0.6418	0.966590576151128	1138A
3.34927	4.200378	2.77696837534132	78.989	102.624	0.5066	1.40681217894791	1138A
4.200378	4.305453	0.703307161551275	102.624	103.363	0.4923	0.346238115631693	1138A
4.305453	9.296522	0.391759761285608	103.363	122.916	0.71985	0.282008264161445	1138A
9.296522	10.43396	3.14760013293032	122.916	158.718	0.9772	3.07583484989951	1138A
10.43396	10.896291	NA	158.718	158.718	NA	NA	1138A
10.896291	12.885713	1.23749511164549	158.718	183.337	1.0758	1.33129724110822	1138A
12.885713	18.654688	0.73907409895172	183.337	225.974	1.0981	0.811577268058884	1138A
18.654688	31.120101	0.935532581230963	225.974	342.592	1.11285	1.04110743302288	1138A
31.120101	37.592729	NA	342.592	342.592	0.54525	NA	1138A
37.592729	42.665756	1.14862388865661	342.592	400.862	1.2872	1.47850866947879	1138A
42.665756	49.70579	0.69941423578352	400.862	450.101	1.3776	0.963513051215377	1138A
49.70579	54.686351	NA	450.101	450.101	0.3941	NA	1138A
54.686351	61.243039	0.214025739824741	450.101	464.134	1.6008	0.342612404311445	1138A
61.243039	69.134897	0.571829852995328	464.134	509.262	1.55785	0.890825136488772	1138A
0	0.153959	5.28387427821693	0	8.135	0.54	2.85329211023714	1143A
0.153959	0.769795	5.29930046311031	8.135	40.77	0.6251	3.31259271949025	1143A
0.769795	2.568698	4.27849639474724	40.77	117.736	0.88625	3.79181742984475	1143A
2.568698	5.04779	2.808326596996	117.736	187.357	1.0676	2.99816947495293	1143A
5.04779	5.47654	5.09620991253644	187.357	209.207	1.046	5.33063556851312	1143A
5.47654	8.796296	6.19708195421591	209.207	414.935	1.11335	6.89952119372629	1143A
8.796296	10.483871	4.08112232048946	414.935	483.807	0.57265	2.33705469682829	1143A
0	2.526587	0.830527506078358	0	20.984	1.1098	0.921719426245762	1168A
2.526587	5.401194	2.29311345863974	20.984	86.902	1.2359	2.83405892353285	1168A
5.401194	7.394255	1.65368746867256	86.902	119.861	1.25265	2.07149160763268	1168A
7.394255	15.90309	1.56015482730597	119.861	252.612	1.1279	1.7596986297184	1168A
15.90309	16.70798	0.568773372759012	252.612	257.19	1.3641	0.775863757780568	1168A
16.70798	17.244573	1.19438755257709	257.19	263.599	1.2839	1.53347417875373	1168A
17.244573	17.51287	3.41226327540003	263.599	272.754	1.3279	4.5311444034037	1168A
17.51287	18.011135	1.65373847249958	272.754	280.994	1.2761	2.11033566475671	1168A
18.011135	18.471072	1.39323429078329	280.994	287.402	1.3156	1.8329390329545	1168A
18.471072	18.777697	11.0476966979209	287.402	321.277	1.3814	15.2612882185079	1168A
18.777697	19.774227	2.66424492990678	321.277	347.827	1.448	3.85782665850501	1168A
19.774227	26.826596	4.38785888826861	347.827	657.275	1.4933	6.55238967785151	1168A
26.826596	34.338901	1.26745386402709	657.275	752.49	1.6358	2.07330103077551	1168A
34.338901	37.098523	4.54507899994999	752.49	877.917	1.65305	7.51324284086734	1168A
0.261149	0.273994	3.67458154924095	0	0.472	NA	NA	1170A
0.273994	0.551388	5.9435315832354	0.472	16.959	0.9521	5.65883642039842	1170A
0.551388	0.912874	5.02481423900234	16.959	35.123	0.99445	4.99692651997588	1170A
0.912874	1.62119	NA	35.123	35.123	0.9239	NA	1170A
1.62119	2.031525	2.31055113504819	35.123	44.604	1.0735	2.48037664347424	1170A
2.031525	2.783806	2.52086653790273	44.604	63.568	0.9639	2.42986325588444	1170A
2.783806	3.413964	NA	63.568	63.568	0.9183	NA	1170A
3.413964	4.14182	2.80934690378317	63.568	84.016	0.9949	2.79501923457387	1170A
4.14182	5.104765	2.78541349713639	84.016	110.838	1.1208	3.12189144759046	1170A
5.104765	6.249237	3.90197401072285	110.838	155.495	1.1986	4.67690604925241	1170A
6.249237	6.847399	1.51681317101387	155.495	164.568	1.1651	1.76723902554826	1170A
6.847399	8.733579	1.55616112990276	164.568	193.92	1.0966	1.70648629505137	1170A
8.733579	10.799211	NA	193.92	193.92	1.02785	NA	1170A
10.799211	13.021484	3.13273841692717	193.92	263.538	1.1056	3.46355559375468	1170A
13.021484	13.390086	2.50405586513365	263.538	272.768	1.07015	2.67971538407278	1170A
13.390086	13.758688	1.39120243514687	272.768	277.896	1.08035	1.50298555081092	1170A
13.758688	14.227872	1.98067282771791	277.896	287.189	1.1441	2.26608778219206	1170A
14.227872	14.925972	1.3702907892852	287.189	296.755	1.1431	1.56637940123191	1170A
14.925972	15.939584	1.02317257491032	296.755	307.126	1.1278	1.15393402998386	1170A
15.939584	16.492487	0.83468528837789	307.126	311.741	1.09295	0.912269285932615	1170A
16.492487	17.53686	1.08026538411085	311.741	323.023	1.0996	1.18785981636829	1170A
17.53686	18.734817	1.49821738175911	323.023	340.971	1.11275	1.66714139155245	1170A
18.734817	23.925964	1.00758079091191	340.971	393.276	1.17565	1.18456235683559	1170A
23.925964	25.154637	0.918226411746655	393.276	404.558	1.14825	1.0543534772881	1170A
25.154637	29.670013	0.840395129885086	404.558	442.505	1.2098	1.01671002813498	1170A
27.184751	38.438416	0.927831066590306	420.562	524.977	1.2352	1.14605693345235	1170D
38.438416	42.76393	5.79336929668936	524.977	775.57	1.2665	7.33730221425707	1170D
0	0.939717	1.56621621190209	0	14.718	NA	NA	1171C
0.939717	1.845138	1.07408597768331	14.718	24.443	NA	NA	1171C
1.845138	3.244424	0.858509268298261	24.443	36.456	NA	NA	1171C
3.244424	5.439384	1.12070379414659	36.456	61.055	NA	NA	1171C
5.439384	9.801866	0.452403012780339	61.055	80.791	NA	NA	1171C
9.801866	11.091404	2.17372423301989	80.791	108.822	NA	NA	1171C
11.091404	11.941951	2.38775752545127	108.822	129.131	1.052	2.51192091677474	1171C
11.941951	12.463254	1.15211307051753	129.131	135.137	0.9613	1.1075262946885	1171C
12.463254	13.889978	2.10510231831805	135.137	165.171	1.0147	2.13604732239732	1171C
13.889978	15.536197	1.42478005660243	165.171	188.626	1.0278	1.46438894217598	1171C
15.536197	18.664014	0.62183944904705	188.626	208.076	1.0232	0.636266124264942	1171C
18.664014	19.70662	1.45404879695686	208.076	223.236	1.049	1.52529718800774	1171C
19.70662	23.822169	0.938246634896099	223.236	261.85	1.0955	1.02784918852868	1171C
23.822169	25.605574	0.673599098353989	261.85	273.863	1.026	0.691112674911193	1171C
25.605574	34.742092	NA	273.863	273.863	NA	NA	1171C
20	25.13233	0.498058386736629	240	265.562	NA	NA	1171D
25.13233	36.587563	NA	265.562	265.562	NA	NA	1171D
36.587563	43.441397	2.54715827666675	265.562	440.14	1.06355	2.70903018514893	1171D
43.441397	45.726008	3.65169387698825	440.14	523.567	1.1674	4.26298743199609	1171D
45.726008	47.302711	2.89058877924377	523.567	569.143	1.4702	4.2497436232442	1171D
47.302711	53.995656	3.04698454865534	569.143	773.076	1.5478	4.71612268440874	1171D
53.995656	59.047542	2.40064799561985	773.076	894.354	1.8051	4.3334096968934	1171D
0	0.768749	1.51648977754768	0	11.658	0.8815	1.33678573890828	1172A
0.768749	1.768305	0.457903309069227	11.658	16.235	0.9092	0.416325688605741	1172A
1.768305	2.540689	1.84390147905705	16.235	30.477	0.9429	1.73861470460289	1172A
2.540689	3.358507	1.36827509299135	30.477	41.667	1.0212	1.39728252496277	1172A
3.358507	4.630669	1.99903785838596	41.667	67.098	1.0955	2.18994597386182	1172A
4.630669	6.039134	1.87785993972161	67.098	93.547	1.1177	2.09888405462685	1172A
6.039134	6.448043	2.98526077929319	93.547	105.754	1.11165	3.31856514530128	1172A
6.448043	6.675215	0.895356822143572	105.754	107.788	0.8642	0.773767365696475	1172A
6.675215	7.311296	3.03860671832676	107.788	127.116	1.1462	3.48285102054613	1172A
7.311296	8.719761	1.91392757363513	127.116	154.073	1.13185	2.16627892421892	1172A
8.719761	9.12867	2.98526077929319	154.073	166.28	1.11575	3.33080471449638	1172A
9.12867	9.764751	1.35941806153619	166.28	174.927	1.1057	1.50310855064056	1172A
9.764751	13.733932	3.13135127876507	174.927	299.216	1.16165	3.63753421297744	1172A
13.733932	18.760753	0.532603010928775	299.216	325.989	1.2484	0.664901598843483	1172A
18.760753	19.748969	1.09986075918626	325.989	336.858	1.32515	1.45748048503567	1172A
19.748969	29.119785	0.204251155929217	336.858	355.998	1.3465	0.27502418145869	1172A
29.119785	30.081252	0.293197790459789	355.998	358.817	1.08745	0.318837937235498	1172A
30.081252	35.46568	NA	358.817	358.817	1.01275	NA	1172A
35.46568	36.063215	0.634774532035781	358.817	362.61	1.0678	0.677812245307807	1172A
36.063215	36.934494	NA	362.61	362.61	0.9344	NA	1172A
36.934494	37.706878	0.39514024112358	362.61	365.662	0.94355	0.372834574512154	1172A
37.706878	38.206656	0.406980699430558	365.662	367.696	1.02485	0.417094169811407	1172A
38.206656	38.342959	NA	367.696	367.696	1.02485	NA	1172A
38.342959	41.159889	2.20285914097972	367.696	429.749	1.0245	2.25682918993372	1172A
41.159889	42.307565	0.944517442204943	429.749	440.589	1.0718	1.01233379455526	1172A
42.307565	53.473309	1.37660329665448	440.589	594.297	0.91955	1.26585556143863	1172A
0	1.778	3.67941507311586	0	65.42	0.4224	1.55418492688414	1179C
1.778	1.945	2.63473053892215	65.42	69.82	0.426	1.12239520958084	1179C
1.945	2.128	3.74316939890711	69.82	76.67	0.4173	1.56202459016394	1179C
2.128	2.148	2.99999999999997	76.67	77.27	0.39605	1.18814999999999	1179C
2.148	2.581	4.36489607390301	77.27	96.17	0.43925	1.9172806004619	1179C
2.581	3.032	2.29490022172949	96.17	106.52	0.3792	0.870226164079822	1179C
3.032	3.116	3.45238095238096	106.52	109.42	0.36505	1.26029166666667	1179C
3.116	3.207	3.62637362637363	109.42	112.72	0.35635	1.29225824175824	1179C
3.207	3.33	2.27642276422764	112.72	115.52	0.38665	0.880178861788615	1179C
3.33	3.596	3.1015037593985	115.52	123.77	0.3689	1.14414473684211	1179C
3.596	4.187	3.38917089678511	123.77	143.8	0.33825	1.14638705583756	1179C
4.187	4.3	5.37168141592922	143.8	149.87	0.3398	1.82529734513275	1179C
4.3	4.493	3.13471502590672	149.87	155.92	0.3357	1.05232383419689	1179C
4.493	4.631	2.97101449275364	155.92	160.02	0.39235	1.16567753623189	1179C
4.631	4.799	2.44047619047618	160.02	164.12	0.4444	1.08454761904762	1179C
4.799	4.896	2.88659793814433	164.12	166.92	0.3806	1.09863917525773	1179C
4.896	4.997	2.90099009900991	166.92	169.85	0.39935	1.15851039603961	1179C
4.997	5.235	2.46638655462185	169.85	175.72	0.3749	0.92464831932773	1179C
5.235	6.033	2.12406015037594	175.72	192.67	0.4183	0.888494360902255	1179C
6.033	6.252	2.36529680365298	192.67	197.85	0.4003	0.946828310502287	1179C
6.252	6.436	1.53260869565217	197.85	200.67	0.43355	0.664462499999998	1179C
6.436	6.733	2.12121212121213	200.67	206.97	0.41095	0.871712121212124	1179C
6.733	7.14	1.78132678132678	206.97	214.22	0.4316	0.768820638820639	1179C
7.14	7.212	3.19444444444446	214.22	216.52	0.4079	1.30301388888889	1179C
7.212	7.251	1.92307692307689	216.52	217.27	0.3679	0.707499999999989	1179C
7.251	7.285	2.05882352941174	217.27	217.97	0.4397	0.905264705882343	1179C
7.285	7.454	1.11242603550296	217.97	219.85	0.4406	0.490134911242603	1179C
7.454	7.489	0.485714285714329	219.85	220.02	0.3679	0.178694285714302	1179C
7.489	7.695	1.01941747572815	220.02	222.12	0.4455	0.454150485436891	1179C
7.695	8.108	0.786924939467312	222.12	225.37	0.5033	0.396059322033898	1179C
8.108	8.771	0.716440422322775	225.37	230.12	0.52355	0.375092383107089	1179C
8.771	9.105	1.00299401197605	230.12	233.47	0.506	0.50751497005988	1179C
9.105	9.311	0.582524271844656	233.47	234.67	0.3679	0.214310679611649	1179C
9.311	9.426	0.869565217391303	234.67	235.67	0.5012	0.435826086956521	1179C
9.426	9.647	0.773755656108601	235.67	237.38	0.5213	0.403358823529413	1179C
9.647	9.721	0.878378378378388	237.38	238.03	0.4834	0.424608108108113	1179C
9.721	9.786	0.599999999999984	238.03	238.42	0.3679	0.220739999999994	1179C
9.786	9.937	0.496688741721855	238.42	239.17	0.3679	0.18273178807947	1179C
9.937	9.984	0.425531914893648	239.17	239.37	0.3679	0.156553191489373	1179C
9.984	11.056	0.6669776119403	239.37	246.52	0.5409	0.360768190298508	1179C
11.056	11.146	0.311111111111107	246.52	246.8	0.3679	0.114457777777776	1179C
11.146	11.188	0.380952380952374	246.8	246.96	0.3679	0.140152380952379	1179C
11.188	11.592	0.086633663366335	246.96	247.31	0.7196	0.062341584158415	1179C
11.592	11.657	0.246153846153843	247.31	247.47	0.3679	0.090559999999999	1179C
11.657	12.049	0.229591836734696	247.47	248.37	0.3679	0.084466836734695	1179C
12.049	12.474	0.108235294117649	248.37	248.83	0.3679	0.039819764705883	1179C
12.474	12.735	0.099616858237545	248.83	249.09	0.3679	0.036649042145593	1179C
12.735	12.77	0.514285714285732	249.09	249.27	0.3679	0.189205714285721	1179C
12.77	12.829	0.169491525423716	249.27	249.37	0.3679	0.062355932203385	1179C
12.829	12.887	0.241379310344805	249.37	249.51	0.3679	0.088803448275854	1179C
12.887	13.032	0.200000000000015	249.51	249.8	0.3679	0.073580000000005	1179C
13.032	13.183	0.271523178807945	249.8	250.21	0.3679	0.099893377483443	1179C
13.183	13.363	0.127777777777772	250.21	250.44	0.3679	0.047009444444442	1179C
13.363	13.608	0.232653061224486	250.44	251.01	0.3679	0.085593061224488	1179C
13.608	13.739	0.12213740458015	251.01	251.17	0.3679	0.044934351145037	1179C
13.739	14.609	0.188505747126439	251.17	252.81	0.3679	0.069351264367817	1179C
14.609	14.775	0.108433734939763	252.81	252.99	0.3679	0.039892771084339	1179C
14.775	14.87	0.315789473684196	252.99	253.29	0.3679	0.116178947368416	1179C
14.87	15.032	0.067901234567909	253.29	253.4	0.3679	0.024980864197534	1179C
15.032	15.16	0.218750000000001	253.4	253.68	0.3679	0.080478125	1179C
15.16	15.974	0.125307125307123	253.68	254.7	0.3679	0.046100491400491	1179C
15.974	16.268	0.176870748299323	254.7	255.22	0.3679	0.065070748299321	1179C
16.268	16.303	0.285714285714268	255.22	255.32	0.3679	0.105114285714279	1179C
16.303	16.472	0.047337278106516	255.32	255.4	0.3679	0.017415384615387	1179C
16.472	16.543	0.154929577464772	255.4	255.51	0.3679	0.05699859154929	1179C
16.543	16.721	0.117977528089892	255.51	255.72	0.3679	0.043403932584271	1179C
16.721	17.235	0.073929961089499	255.72	256.1	0.3679	0.027198832684827	1179C
17.235	17.533	0.167785234899328	256.1	256.6	0.3679	0.061728187919463	1179C
0	0.781	1.58130601792574	0	12.35	0.77965	1.2328652368758	1207A
0.781	0.988	1.88888888888889	12.35	16.26	0.78915	1.49061666666667	1207A
0.988	1.072	0.607142857142854	16.26	16.77	0.8452	0.51315714285714	1207A
1.072	1.778	1.07790368271955	16.77	24.38	0.7494	0.807781019830028	1207A
1.778	1.945	2.40718562874251	24.38	28.4	0.6817	1.64097844311377	1207A
1.945	2.128	0.726775956284154	28.4	29.73	0.7735	0.562161202185793	1207A
2.128	2.148	2.6	29.73	30.25	0.63315	1.64619	1207A
2.148	2.581	2.97459584295612	30.25	43.13	0.7574	2.25295889145497	1207A
2.581	3.032	1.91574279379157	43.13	51.77	0.76705	1.46947050997783	1207A
3.032	3.116	1.76190476190476	51.77	53.25	0.7987	1.40723333333333	1207A
3.116	3.207	3.8901098901099	53.25	56.79	0.8289	3.2245120879121	1207A
3.207	3.33	1.60975609756098	56.79	58.77	0.7381	1.18816097560976	1207A
3.33	3.596	3.06015037593985	58.77	66.91	0.8601	2.63203533834586	1207A
3.596	4.187	2.25380710659899	66.91	80.23	0.7302	1.64572994923858	1207A
4.187	4.3	2.75221238938054	80.23	83.34	0.7283	2.00443628318585	1207A
4.3	4.493	1.99481865284973	83.34	87.19	0.75795	1.51197279792745	1207A
4.493	4.631	2.3695652173913	87.19	90.46	0.903	2.13971739130435	1207A
4.631	4.799	1.14880952380953	90.46	92.39	0.7273	0.835529166666669	1207A
4.799	4.896	1.98969072164949	92.39	94.32	0.78215	1.55623659793815	1207A
4.896	4.997	2.49504950495051	94.32	96.84	0.8706	2.17219009900991	1207A
4.997	5.235	1.30672268907563	96.84	99.95	0.8432	1.10182857142857	1207A
5.235	6.033	0.724310776942356	99.95	105.73	0.83295	0.603314661654135	1207A
6.033	6.252	0.474885844748856	105.73	106.77	0.8444	0.400993607305934	1207A
6.252	6.436	1.36956521739131	106.77	109.29	0.7746	1.06086521739131	1207A
6.436	6.733	1.64646464646465	109.29	114.18	0.80145	1.31955909090909	1207A
6.733	7.14	0.584766584766584	114.18	116.56	0.8457	0.4945371007371	1207A
7.14	7.212	5.34722222222221	116.56	120.41	0.84615	4.52455208333332	1207A
7.212	7.454	1.10330578512397	120.41	123.08	0.8109	0.894670661157025	1207A
7.454	7.489	1.28571428571429	123.08	123.53	0.8487	1.09118571428572	1207A
7.489	7.695	1.36407766990291	123.53	126.34	0.97525	1.33031674757281	1207A
7.695	8.108	0.646489104116219	126.34	129.01	0.87445	0.565322397094428	1207A
8.108	8.771	0.828054298642535	129.01	134.5	0.8701	0.72049004524887	1207A
8.771	9.105	0.664670658682635	134.5	136.72	0.9371	0.622862874251497	1207A
9.105	9.311	0.504854368932036	136.72	137.76	0.80185	0.404817475728153	1207A
9.311	9.426	0.513043478260872	137.76	138.35	0.9976	0.511812173913046	1207A
9.426	9.647	0.873303167420817	138.35	140.28	0.934	0.815665158371043	1207A
9.647	9.721	0.594594594594593	140.28	140.72	0.80185	0.476775675675674	1207A
9.721	9.786	0.923076923076921	140.72	141.32	0.80185	0.740169230769229	1207A
9.786	9.937	0.688741721854319	141.32	142.36	0.9835	0.677377483443723	1207A
9.937	9.984	0.61702127659572	142.36	142.65	0.80185	0.494758510638278	1207A
9.984	11.056	0.816231343283583	142.65	151.4	1.0044	0.81982276119403	1207A
11.056	11.146	2.46666666666662	151.4	153.62	1.0651	2.62724666666662	1207A
11.146	11.188	1.07142857142855	153.62	154.07	1.0741	1.1508214285714	1207A
11.188	11.592	0.257425742574263	154.07	155.11	0.7877	0.202774257425747	1207A
11.592	11.657	0.446153846153837	155.11	155.4	0.78665	0.350966923076916	1207A
11.657	12.049	0.614795918367347	155.4	157.81	1.0743	0.660475255102041	1207A
12.049	12.174	2.36800000000001	157.81	160.77	1.092	2.58585600000001	1207A
12.174	12.272	1.01020408163263	160.77	161.76	0.78665	0.794677040816305	1207A
12.272	12.451301	0.861121800770774	161.76	163.304	1.1157	0.960753593119953	1207A
12.451301	74.972729	NA	163.304	163.304	0.7766	NA	1207A
74.972729	81.182019	1.19132783297285	163.304	237.277	1.1349	1.35203795764089	1207A
0	0.781	1.58130601792574	0	12.35	NA	NA	1207B
0.781	0.988	1.88888888888889	12.35	16.26	NA	NA	1207B
0.988	1.072	0.607142857142854	16.26	16.77	NA	NA	1207B
1.072	1.778	1.07790368271955	16.77	24.38	NA	NA	1207B
1.778	1.945	2.40718562874251	24.38	28.4	NA	NA	1207B
1.945	2.128	0.726775956284154	28.4	29.73	NA	NA	1207B
2.128	2.148	2.6	29.73	30.25	NA	NA	1207B
2.148	2.581	2.97459584295612	30.25	43.13	NA	NA	1207B
2.581	3.032	1.91574279379157	43.13	51.77	NA	NA	1207B
3.032	3.116	1.76190476190476	51.77	53.25	NA	NA	1207B
3.116	3.207	3.8901098901099	53.25	56.79	NA	NA	1207B
3.207	3.33	1.60975609756098	56.79	58.77	NA	NA	1207B
3.33	3.596	3.06015037593985	58.77	66.91	NA	NA	1207B
3.596	4.187	2.25380710659899	66.91	80.23	NA	NA	1207B
4.187	4.3	2.75221238938054	80.23	83.34	NA	NA	1207B
4.3	4.493	1.99481865284973	83.34	87.19	NA	NA	1207B
4.493	4.631	2.3695652173913	87.19	90.46	NA	NA	1207B
4.631	4.799	1.14880952380953	90.46	92.39	NA	NA	1207B
4.799	4.896	1.98969072164949	92.39	94.32	NA	NA	1207B
4.896	4.997	2.49504950495051	94.32	96.84	NA	NA	1207B
4.997	5.235	1.30672268907563	96.84	99.95	NA	NA	1207B
5.235	6.033	0.724310776942356	99.95	105.73	NA	NA	1207B
6.033	6.252	0.474885844748856	105.73	106.77	NA	NA	1207B
6.252	6.436	1.36956521739131	106.77	109.29	NA	NA	1207B
6.436	6.733	1.64646464646465	109.29	114.18	NA	NA	1207B
6.733	7.14	0.584766584766584	114.18	116.56	NA	NA	1207B
7.14	7.212	5.34722222222221	116.56	120.41	NA	NA	1207B
7.212	7.454	1.10330578512397	120.41	123.08	NA	NA	1207B
7.454	7.489	1.28571428571429	123.08	123.53	NA	NA	1207B
7.489	7.695	1.36407766990291	123.53	126.34	NA	NA	1207B
7.695	8.108	0.646489104116219	126.34	129.01	NA	NA	1207B
8.108	8.771	0.828054298642535	129.01	134.5	NA	NA	1207B
8.771	9.105	0.664670658682635	134.5	136.72	NA	NA	1207B
9.105	9.311	0.504854368932036	136.72	137.76	NA	NA	1207B
9.311	9.426	0.513043478260872	137.76	138.35	NA	NA	1207B
9.426	9.647	0.873303167420817	138.35	140.28	NA	NA	1207B
9.647	9.721	0.594594594594593	140.28	140.72	NA	NA	1207B
9.721	9.786	0.923076923076921	140.72	141.32	NA	NA	1207B
9.786	9.937	0.688741721854319	141.32	142.36	NA	NA	1207B
9.937	9.984	0.61702127659572	142.36	142.65	NA	NA	1207B
9.984	11.056	0.816231343283583	142.65	151.4	NA	NA	1207B
11.056	11.146	2.46666666666662	151.4	153.62	NA	NA	1207B
11.146	11.188	1.07142857142855	153.62	154.07	NA	NA	1207B
11.188	11.592	0.257425742574263	154.07	155.11	NA	NA	1207B
11.592	11.657	0.446153846153837	155.11	155.4	NA	NA	1207B
11.657	12.049	0.614795918367347	155.4	157.81	NA	NA	1207B
12.049	12.174	2.36800000000001	157.81	160.77	NA	NA	1207B
12.174	12.272	1.01020408163263	160.77	161.76	NA	NA	1207B
12.272	12.34433	2.8480575141712	161.76	163.82	NA	NA	1207B
12.34433	75.11589	NA	163.82	163.82	NA	NA	1207B
75.11589	81.28507	1.1387899202163	163.82	234.074	1.1722	1.33488954447755	1207B
81.28507	93.48633	0.869738043447972	234.074	340.193	NA	NA	1207B
93.48633	96.0911	1.09491433024797	340.193	368.713	NA	NA	1207B
96.0911	103.2199	0.716389855235103	368.713	419.783	NA	NA	1207B
103.2199	112.8164	0.767165112280518	419.783	493.404	NA	NA	1207B
112.8164	123.7838	0.622891478381385	493.404	561.719	NA	NA	1207B
123.7838	126.2515	0.376261295943591	561.719	571.004	NA	NA	1207B
0	1.07504	5.28436151212978	0	56.809	0.65535	3.46310631697425	1208A
1.07504	2.015957	4.17603252996811	56.809	96.102	0.7332	3.06186705097261	1208A
2.015957	3.60066	3.94471393062296	96.102	158.614	0.81035	3.19659893368032	1208A
3.60066	5.598047	2.52610035010741	158.614	209.07	0.7802	1.9708634931538	1208A
5.598047	6.401747	2.16859524698271	209.07	226.499	0.8168	1.77130859773547	1208A
6.401747	7.545911	1.63778968749235	226.499	245.238	0.7915	1.2963105376502	1208A
7.545911	9.05209	1.17024603317401	245.238	262.864	0.84415	0.987863188903841	1208A
9.05209	14.118922	1.14225220019136	262.864	320.74	0.932	1.06457905057835	1208A
14.118922	32.359516	NA	320.74	320.74	0.65135	NA	1208A
32.359516	33.528785	0.569415592134916	320.74	327.398	0.7149	0.407075206817252	1208A
33.528785	76.01222	NA	327.398	327.398	0.71845	NA	1208A
76.01222	81.780613	0.843510488969804	327.398	376.055	1.1848	0.999391227331424	1208A
0	0.753695	1.43599201268418	0	10.823	0.80615	1.15762496102535	1209A
0.753695	1.132436	0.90774434243982	10.823	14.261	0.86605	0.786151987770006	1209A
1.132436	1.795233	1.19719914242219	14.261	22.196	0.81755	0.978770158887261	1209A
1.795233	1.937261	1.86160475399217	22.196	24.84	0.91305	1.69973822063255	1209A
1.937261	2.552716	1.46119537577889	24.84	33.833	0.9249	1.3514596030579	1209A
2.552716	3.026143	2.45803471284908	33.833	45.47	0.93695	2.30305562420394	1209A
3.026143	3.357541	0.638507172644373	45.47	47.586	0.96575	0.616638301981303	1209A
3.357541	3.594255	2.34629130511926	47.586	53.14	0.9428	2.21208344246644	1209A
3.594255	4.162367	1.16403103613372	53.14	59.753	0.90985	1.05909363822627	1209A
4.162367	4.304395	1.67572591320021	59.753	62.133	1.0026	1.68008280057453	1209A
4.304395	4.777821	0.949673232986782	62.133	66.629	0.9741	0.925076696252425	1209A
4.777821	5.014535	1.00585516699477	66.629	69.01	0.94965	0.955210359336583	1209A
5.014535	5.203905	1.67555579025189	69.01	72.183	0.9799	1.64187711886783	1209A
5.203905	6.00873	0.361569285248345	72.183	75.093	0.7543	0.272731711862827	1209A
6.00873	6.482157	0.726194323517671	75.093	78.531	0.9105	0.661199931562839	1209A
6.482157	6.766213	1.3965556087532	78.531	82.498	0.96525	1.34802530134903	1209A
6.766213	7.097612	0.798131557427751	82.498	85.143	1.0005	0.798530623206465	1209A
7.097612	7.23964	1.86230884051032	85.143	87.788	0.9511	1.77124193820937	1209A
7.23964	12.35265	0.351749752102969	87.788	105.773	0.992	0.348935754086145	1209A
12.35265	27.40761	0.052706881984409	105.773	113.708	1.0823	0.057044658371726	1209A
27.40761	30.01146	0.325018722276629	113.708	122.171	1.1056	0.359340699349041	1209A
30.01146	40.23748	0.183639382672829	122.171	140.95	1.14845	0.21090064903061	1209A
40.23748	43.26741	0.637209440482124	140.95	160.257	1.1166	0.711508061242339	1209A
43.26741	53.87216	0.304269313279427	160.257	192.524	1.2377	0.376594129045946	1209A
53.87216	56.04993	0.315781740036827	192.524	199.401	1.2935	0.408463680737635	1209A
56.04993	56.57069	0.050887164912818	199.401	199.666	0.83815	0.042651077271678	1209A
56.57069	57.89629	0.678334339167168	199.666	208.658	1.21365	0.823260470730234	1209A
57.89629	58.36972	NA	208.658	208.658	0.92595	NA	1209A
58.36972	58.74846	0.628399429687918	208.658	211.038	1.2298	0.772805618630201	1209A
58.74846	59.07986	0.319251659625832	211.038	212.096	1.1935	0.381026855763431	1209A
59.07986	59.97937	0.382319262709694	212.096	215.535	1.2161	0.464938455381259	1209A
59.97937	60.35811	0.628399429687911	215.535	217.915	1.22565	0.770197760996987	1209A
60.35811	60.97356	NA	217.915	217.915	0.9581	NA	1209A
60.97356	62.58321	0.509365389991613	217.915	226.114	1.1873	0.604769527537042	1209A
62.58321	63.95615	0.11559135869011	226.114	227.701	0.92525	0.106950904628024	1209A
63.95615	63.15132	-0.032801958177505	227.701	227.965	1.0015	-0.032851161114771	1209A
63.15132	65.04503	0.237470362410295	227.965	232.462	0.92525	0.219719452820125	1209A
65.04503	65.42377	0.749326714896754	232.462	235.3	0.93895	0.703580318952307	1209A
65.42377	66.35	NA	235.3	235.3	0.99355	NA	1209A
66.35	69.1165	0.767395626242541	235.3	256.53	1.1824	0.907368588469181	1209A
0	0.768149	1.48109286089027	0	11.377	NA	NA	1209B
0.768149	1.111073	0.889993118008655	11.377	14.429	NA	NA	1209B
1.111073	1.925517	1.52373889426406	14.429	26.839	NA	NA	1209B
1.925517	2.568499	1.13906765663735	26.839	34.163	NA	NA	1209B
2.568499	2.997154	2.13598348322077	34.163	43.319	NA	NA	1209B
2.997154	3.554405	1.53342030790434	43.319	51.864	NA	NA	1209B
3.554405	4.283118	1.42388018328203	51.864	62.24	NA	NA	1209B
4.283118	5.011831	0.921213152503112	62.24	68.953	NA	NA	1209B
5.011831	5.183293	2.01735661545999	68.953	72.412	NA	NA	1209B
5.183293	6.040602	0.332202274792403	72.412	75.26	NA	NA	1209B
6.040602	6.426391	0.896604102242415	75.26	78.719	NA	NA	1209B
6.426391	6.72645	1.22042664942561	78.719	82.381	NA	NA	1209B
6.72645	7.19797	1.29453681710214	82.381	88.485	NA	NA	1209B
7.19797	11.655979	0.273821789054261	88.485	100.692	NA	NA	1209B
11.655979	16.328315	0.200285253457799	100.692	110.05	NA	NA	1209B
16.328315	30.0024	0.068443336427995	110.05	119.409	NA	NA	1209B
30.0024	37.975378	0.232209345115464	119.409	137.923	NA	NA	1209B
37.975378	43.290697	0.176075979635465	137.923	147.282	NA	NA	1209B
43.290697	52.530434	0.311480727211175	147.282	176.062	NA	NA	1209B
52.530434	53.01999	1.81347996960511	176.062	184.94	NA	NA	1209B
53.01999	54.39293	0.440150334319053	184.94	190.983	NA	NA	1209B
54.39293	54.9137	0.386735026979283	190.983	192.997	NA	NA	1209B
54.9137	55.67118	0.354464804351266	192.997	195.682	NA	NA	1209B
55.67118	56.04993	0.354587458745876	195.682	197.025	NA	NA	1209B
56.04993	56.57069	0.322413395806133	197.025	198.704	NA	NA	1209B
56.57069	56.76006	0.886096002534701	198.704	200.382	NA	NA	1209B
56.76006	57.51755	0.664695243501567	200.382	205.417	NA	NA	1209B
57.51755	57.94363	0.39405745399925	205.417	207.096	NA	NA	1209B
57.94363	58.32237	0.265881607435181	207.096	208.103	NA	NA	1209B
58.32237	58.70111	0.797644822305535	208.103	211.124	NA	NA	1209B
58.70111	59.07986	0.26587458745875	211.124	212.131	NA	NA	1209B
59.07986	60.50014	0.307263356521248	212.131	216.495	NA	NA	1209B
60.50014	61.49433	0.405254528812401	216.495	220.524	NA	NA	1209B
61.49433	61.96776	0.70908053988974	220.524	223.881	NA	NA	1209B
61.96776	62.81993	0.118168909959281	223.881	224.888	NA	NA	1209B
62.81993	63.10398	0.590741066713605	224.888	226.566	NA	NA	1209B
63.10398	63.53007	NA	226.566	226.566	NA	NA	1209B
63.53007	65.37643	0.454515912389784	226.566	234.958	NA	NA	1209B
65.37643	65.75517	1.1522416433437	234.958	239.322	NA	NA	1209B
65.75517	69.1165	0.659143850797156	239.322	261.478	1.18505	0.781118420387169	1209B
69.1165	70.1107	1.78957956145646	261.478	279.27	NA	NA	1209B
17.68783	29.92784	0.076462355831409	107.918	117.277	NA	NA	1209C
29.92784	37.93673	0.231168114432837	117.277	135.791	NA	NA	1209C
37.93673	43.98118	0.319764411981239	135.791	155.119	NA	NA	1209C
43.98118	50.78119	0.415867035489654	155.119	183.398	NA	NA	1209C
50.78119	53.95453	0.288528805611753	183.398	192.554	NA	NA	1209C
53.95453	55.66712	0.249446744404673	192.554	196.826	NA	NA	1209C
55.66712	56.12046	0.403891119248246	196.826	198.657	NA	NA	1209C
56.12046	56.62416	0.36351002580901	198.657	200.488	NA	NA	1209C
56.62416	57.2286	0.706935345112835	200.488	204.761	NA	NA	1209C
57.2286	57.98416	0.376938959182593	204.761	207.609	NA	NA	1209C
57.98416	58.73972	0.484673619566944	207.609	211.271	NA	NA	1209C
58.73972	59.4449	0.057715760515047	211.271	211.678	NA	NA	1209C
59.4449	60.50268	0.519295127531244	211.678	217.171	NA	NA	1209C
60.50268	61.45972	0.403953857727996	217.171	221.037	NA	NA	1209C
61.45972	61.91305	0.269119625879601	221.037	222.257	NA	NA	1209C
61.91305	63.17231	0.355446849737146	222.257	226.733	NA	NA	1209C
63.17231	64.43157	0.258564553785559	226.733	229.989	NA	NA	1209C
64.43157	65.18713	0.296204139975646	229.989	232.227	NA	NA	1209C
65.18713	65.48935	0.91754351134933	232.227	235	NA	NA	1209C
65.48935	67.7	NA	235	235	NA	NA	1209C
67.7	69.16639	1.86423802671867	235	262.337	NA	NA	1209C
69.16639	70.02269	1.8057923624898	262.337	277.8	NA	NA	1209C
0	2.499674	1.76334994083228	0	44.078	0.8771	1.546634233104	1210A
2.499674	5.489254	1.26887388863988	44.078	82.012	0.95555	1.21247244428983	1210A
5.489254	8.093081	0.379019036210931	82.012	91.881	0.96705	0.366530358967781	1210A
8.093081	9.539652	0.490331964348795	91.881	98.974	0.974	0.477583333275726	1210A
9.539652	10.69691	0.213262729659245	98.974	101.442	1.0559	0.225184116247197	1210A
10.69691	17.73689	0.131420827900079	101.442	110.694	1.0434	0.137124491830943	1210A
17.73689	32.00972	0.064822463379722	110.694	119.946	1.1451	0.07422820281612	1210A
32.00972	37.98888	0.154737454759532	119.946	129.198	1.1485	0.177715966791322	1210A
37.98888	52.55102	0.328275926477839	129.198	177.002	1.18935	0.390434973156418	1210A
52.55102	55.44417	0.319789848435096	177.002	186.254	0.939	0.300282667680555	1210A
55.44417	60.65182	0.37310495136962	186.254	205.684	1.2176	0.454292588787649	1210A
60.65182	62.29127	0.583122388605936	205.684	215.244	1.16905	0.68169922839977	1210A
62.29127	66.041056	0.123260367391633	215.244	219.866	0.936	0.115371703878568	1210A
66.041056	69.04193	0.750381388888704	219.866	242.384	1.1743	0.881172864972005	1210A
0	1.92811	1.45733386580641	0	28.099	NA	NA	1210B
1.92811	2.34246	2.14818390249789	28.099	37	NA	NA	1210B
2.34246	3.792686	1.37482020043773	37	56.938	NA	NA	1210B
3.792686	5.519146	1.67041228872954	56.938	85.777	NA	NA	1210B
5.519146	11.11288	0.330977483019393	85.777	104.291	NA	NA	1210B
11.11288	17.67342	0.146527572425441	104.291	113.904	NA	NA	1210B
17.67342	37.97659	0.050854127705181	113.904	124.229	NA	NA	1210B
37.97659	52.54791	0.320087679084668	124.229	170.87	NA	NA	1210B
52.54791	58.90128	0.442709931894412	170.87	198.997	NA	NA	1210B
58.90128	65.87618	0.281767480537355	198.997	218.65	NA	NA	1210B
65.87618	68.22416	NA	218.65	218.65	NA	NA	1210B
68.22416	70.1578	1.9664984174924	218.65	256.675	1.1708	2.3023763472001	1210B
70.1578	70.9865	1.33184505852538	256.675	267.712	1.143	1.52229890189451	1210B
70.9865	71.26273	4.25370162545707	267.712	279.462	1.14215	4.8583653115158	1210B
71.26273	76.7874	1.18579028249651	279.462	344.973	1.2106	1.43551771599028	1210B
76.7874	79.2	1.23547210478322	344.973	374.78	1.20255	1.48571697960706	1210B
0	0.344393	0.739271704128713	0	2.546	0.89915	0.664716152767333	1211A
0.344393	0.910914	0.977721920281861	2.546	8.085	0.887	0.867239343290011	1211A
0.910914	1.869185	0.735178253333347	8.085	15.13	0.927	0.681510240840013	1211A
1.869185	2.292607	1.73609307027032	15.13	22.481	0.93955	1.63114624417248	1211A
2.292607	3.028024	1.0827870446291	22.481	30.444	0.9602	1.03969212025286	1211A
3.028024	4.365146	0.824606879551753	30.444	41.47	0.95665	0.788860171323185	1211A
4.365146	5.100563	0.957959905740553	41.47	48.515	0.9129	0.874521597950551	1211A
5.100563	5.791409	NA	48.515	48.515	0.87845	NA	1211A
5.791409	6.950248	0.277519137688669	48.515	51.731	0.97745	0.27126108113379	1211A
6.950248	22.416291	NA	51.731	51.731	0.9042	NA	1211A
22.416291	27.01404	0.213234780759019	51.731	61.535	1.16145	0.247661536112563	1211A
27.01404	28.905046	0.230459342804836	61.535	65.893	1.1278	0.259912046815294	1211A
28.905046	40.329545	0.188585950246046	65.893	87.438	1.1317	0.21342271989345	1211A
40.329545	45.510892	0.087834302547195	87.438	91.989	1.1333	0.099542615076736	1211A
45.510892	49.410831	0.291696870130532	91.989	103.365	1.20295	0.350896749923524	1211A
49.410831	55.149312	0.198240614545905	103.365	114.741	1.1954	0.236976830628175	1211A
55.149312	57.990696	0.271029892474935	114.741	122.442	1.22215	0.331239183088241	1211A
57.990696	62.614909	0.174105301810276	122.442	130.493	1.1283	0.196443012032534	1211A
62.614909	65.679146	0.051399418517563	130.493	132.068	1.06415	0.054696691215465	1211A
0	0.344393	0.739271704128713	0	2.546	NA	NA	1211B
0.344393	0.910914	0.977721920281861	2.546	8.085	NA	NA	1211B
0.910914	1.869185	0.735178253333347	8.085	15.13	NA	NA	1211B
1.869185	2.292607	1.73609307027032	15.13	22.481	NA	NA	1211B
2.292607	3.028024	1.0827870446291	22.481	30.444	NA	NA	1211B
3.028024	4.365146	0.824606879551753	30.444	41.47	NA	NA	1211B
4.365146	5.100563	0.957959905740553	41.47	48.515	NA	NA	1211B
5.100563	5.791409	NA	48.515	48.515	NA	NA	1211B
5.791409	6.950248	0.277519137688669	48.515	51.731	NA	NA	1211B
6.950248	22.416291	NA	51.731	51.731	NA	NA	1211B
22.416291	26.928716	0.238652165963977	51.731	62.5	NA	NA	1211B
26.928716	28.846154	0.277297101653352	62.5	67.817	NA	NA	1211B
28.846154	39.843221	0.193378834556523	67.817	89.083	NA	NA	1211B
39.843221	45.087977	0.097888252570758	89.083	94.217	NA	NA	1211B
45.087977	49.410831	0.211619453259351	94.217	103.365	NA	NA	1211B
49.410831	55.149312	0.198240614545905	103.365	114.741	NA	NA	1211B
55.149312	57.990696	0.271029892474935	114.741	122.442	NA	NA	1211B
57.990696	63.811189	0.163920822514519	122.442	131.983	NA	NA	1211B
63.811189	70.973381	0.406998304429705	131.983	161.133	NA	NA	1211B
0	0.344393	0.739271704128713	0	2.546	NA	NA	1211C
0.344393	1.16877	0.594266943400895	2.546	7.445	NA	NA	1211C
1.16877	1.869185	1.09720665605391	7.445	15.13	NA	NA	1211C
1.869185	2.746611	0.760406005748633	15.13	21.802	NA	NA	1211C
2.746611	3.623188	0.919143440907074	21.802	29.859	NA	NA	1211C
3.623188	4.365146	1.56491337784618	29.859	41.47	NA	NA	1211C
4.365146	5.100563	0.957959905740553	41.47	48.515	NA	NA	1211C
5.100563	5.791409	NA	48.515	48.515	NA	NA	1211C
5.791409	6.950248	0.277519137688669	48.515	51.731	NA	NA	1211C
6.950248	22.416291	NA	51.731	51.731	NA	NA	1211C
22.416291	27.816737	0.262330185321731	51.731	65.898	NA	NA	1211C
27.816737	38.803179	0.20934894117677	65.898	88.898	NA	NA	1211C
38.803179	45.510892	0.046081279863942	88.898	91.989	NA	NA	1211C
45.510892	50.257129	0.225020368767931	91.989	102.669	NA	NA	1211C
50.257129	55.808789	0.203200484179507	102.669	113.95	NA	NA	1211C
55.808789	58.672277	0.271137857047069	113.95	121.714	NA	NA	1211C
58.672277	62.614909	0.222668511796181	121.714	130.493	NA	NA	1211C
62.614909	65.679146	0.051399418517563	130.493	132.068	NA	NA	1211C
65.679146	66.023843	0.588632915285023	132.068	134.097	NA	NA	1211C
66.023843	66.725105	0.62558644272754	134.097	138.484	NA	NA	1211C
66.725105	70.13324	NA	138.484	138.484	NA	NA	1211C
0	0.394137	1.23814815660544	0	4.88	0.7674	0.950154895379018	1212A
0.394137	1.020656	1.10850588729153	4.88	11.825	0.8653	0.959190144273358	1212A
1.020656	2.102825	1.14889633689378	11.825	24.258	0.9062	1.04112986049314	1212A
2.102825	2.501519	1.22575208054297	24.258	29.145	0.89165	1.09294184261614	1212A
2.501519	3.24195	1.36650140256148	29.145	39.263	0.9653	1.3190838038926	1212A
3.24195	3.583687	1.63078624790409	39.263	44.836	1.00605	1.64065250470391	1212A
3.583687	5.121506	0.295483408645621	44.836	49.38	0.9522	0.28135930171236	1212A
5.121506	6.374544	0.123140718797036	49.38	50.923	0.9834	0.121096582865005	1212A
6.374544	7.114975	0.231621852677697	50.923	52.638	0.89615	0.207567923277118	1212A
7.114975	7.171932	3.01104341871941	52.638	54.353	0.954	2.87253542145831	1212A
7.171932	7.285844	1.65566402134981	54.353	56.239	0.9511	1.5747020507058	1212A
7.285844	7.456713	0.602215732520238	56.239	57.268	0.85675	0.515948328836714	1212A
7.456713	7.684538	0.97882146384286	57.268	59.498	0.9229	0.903354328980575	1212A
7.684538	8.083232	0.645106271978008	59.498	62.07	0.9945	0.641558187482129	1212A
8.083232	8.254101	0.544276609566394	62.07	63	1.1236	0.6115491985088	1212A
8.254101	44.843523	NA	63	63	0.91585	NA	1212A
44.843523	57.216157	0.114688594199101	63	77.19	1.17985	0.135315337865809	1212A
57.216157	65.858807	0.257849155062394	77.19	99.475	1.1517	0.296964871885359	1212A
65.858807	67.223435	0.501601901763705	99.475	106.32	1.21015	0.607013541419348	1212A
0	0.394137	1.23814815660544	0	4.88	NA	NA	1212B
0.394137	1.020656	1.10850588729153	4.88	11.825	NA	NA	1212B
1.020656	2.102825	1.14889633689378	11.825	24.258	NA	NA	1212B
2.102825	2.501519	1.22575208054297	24.258	29.145	NA	NA	1212B
2.501519	3.24195	1.36650140256148	29.145	39.263	NA	NA	1212B
3.24195	3.583687	1.63078624790409	39.263	44.836	NA	NA	1212B
3.583687	5.121506	0.295483408645621	44.836	49.38	NA	NA	1212B
5.121506	6.374544	0.123140718797036	49.38	50.923	NA	NA	1212B
6.374544	7.114975	0.231621852677697	50.923	52.638	NA	NA	1212B
7.114975	7.171932	3.01104341871941	52.638	54.353	NA	NA	1212B
7.171932	7.285844	1.65566402134981	54.353	56.239	NA	NA	1212B
7.285844	7.456713	0.602215732520238	56.239	57.268	NA	NA	1212B
7.456713	7.684538	0.97882146384286	57.268	59.498	NA	NA	1212B
7.684538	8.083232	0.645106271978008	59.498	62.07	NA	NA	1212B
8.083232	8.254101	0.544276609566394	62.07	63	NA	NA	1212B
8.254101	44.843523	NA	63	63	NA	NA	1212B
44.843523	57.216157	0.114688594199101	63	77.19	NA	NA	1212B
57.216157	65.858807	0.257849155062394	77.19	99.475	NA	NA	1212B
65.858807	67.223435	0.501601901763705	99.475	106.32	1.1642	0.583964934033306	1212B
67.223435	69.17765	1.13232167392022	106.32	128.448	1.0943	1.23909960777089	1212B
69.17765	75.94249	0.877699989948024	128.448	187.823	1.0925	0.958887239018216	1212B
75.94249	76.76247	1.12136881387353	187.823	197.018	NA	NA	1212B
76.76247	90.21412	0.002245077741392	197.018	197.32	NA	NA	1212B
90.21412	100.4094	NA	197.32	197.32	NA	NA	1212B
100.4094	101.8522	0.692750207929031	197.32	207.315	NA	NA	1212B
0	2.416881	1.61948395473339	0	39.141	NA	NA	1213A
2.416881	3.783209	0.648892506045401	39.141	48.007	NA	NA	1213A
3.783209	5.08	0.203039657122852	48.007	50.64	NA	NA	1213A
5.08	80.145742	NA	50.64	50.64	NA	NA	1213A
80.145742	96.086231	0.099363325679658	50.64	66.479	NA	NA	1213A
96.086231	100.488842	0.425179512793657	66.479	85.198	NA	NA	1213A
100.488842	103.069683	3.29237639978597	85.198	170.169	NA	NA	1213A
103.069683	110.660392	0.253085713073706	170.169	189.38	NA	NA	1213A
110.61244	112.921098	0.857294584126365	189.184	208.976	NA	NA	1213B
112.921098	123.817965	0.441971072969873	208.976	257.137	NA	NA	1213B
123.817965	132.775558	0.110476106695181	257.137	267.033	NA	NA	1213B
132.775558	136.00768	1.44923366135313	267.033	313.874	NA	NA	1213B
136.00768	143.118347	1.49378391647366	313.874	420.092	NA	NA	1213B
98.9	101.894581	0.632776338325796	6.9	25.849	NA	NA	1214A
101.894581	107.60925	0.632845051918143	25.849	62.014	NA	NA	1214A
107.60925	111.84483	1.83856756335614	62.014	139.888	NA	NA	1214A
111.84483	112.920532	3.55842045473563	139.888	178.166	NA	NA	1214A
112.920532	134.165658	0.227383918551483	178.166	226.474	NA	NA	1214A
4.121161	4.301075	0.219549340240337	17.565	17.96	0.3145	0.069048267505586	1218A
4.301075	4.493	NA	17.96	17.96	0.3145	NA	1218A
4.493	4.631	0.144927536231884	17.96	18.16	0.3145	0.045579710144927	1218A
4.631	4.799	0.178571428571429	18.16	18.46	0.395	0.070535714285714	1218A
4.799	4.896	0.164948453608248	18.46	18.62	0.3145	0.051876288659794	1218A
4.896	4.997	0.247524752475248	18.62	18.87	0.3145	0.077846534653465	1218A
4.997	5.235	0.193277310924368	18.87	19.33	0.3145	0.060785714285714	1218A
5.235	6.033	0.226817042606517	19.33	21.14	0.432	0.097984962406015	1218A
6.033	6.252	0.34703196347032	21.14	21.9	0.336	0.116602739726027	1218A
6.252	6.436	0.222826086956522	21.9	22.31	0.296	0.06595652173913	1218A
6.436	6.733	0.353535353535354	22.31	23.36	0.368	0.13010101010101	1218A
6.733	7.696957	0.419105831484184	23.36	27.4	0.361	0.15129720516579	1218A
7.696957	8.108	NA	27.4	27.4	0.307	NA	1218A
8.108	8.771	0.075414781297134	27.4	27.9	0.3315	0.025	1218A
8.771	9.105	0.182634730538923	27.9	28.51	0.342	0.062461077844312	1218A
9.105	9.311	0.169902912621359	28.51	28.86	0.3475	0.059041262135922	1218A
9.311	9.426	0.217391304347826	28.86	29.11	0.3475	0.075543478260869	1218A
9.426	9.786	0.113888888888889	29.11	29.52	0.373	0.042480555555556	1218A
9.786	11.056	0.204724409448819	29.52	32.12	0.418	0.085574803149606	1218A
11.056	11.592	0.242537313432836	32.12	33.42	0.283	0.068638059701493	1218A
11.592	11.657	0.430769230769236	33.42	33.7	0.3685	0.158738461538463	1218A
11.657	12.049	0.216836734693876	33.7	34.55	0.284	0.061581632653061	1218A
12.049	12.174	0.320000000000005	34.55	34.95	0.3865	0.123680000000002	1218A
12.174	12.272	0.336734693877547	34.95	35.28	0.3865	0.130147959183672	1218A
12.272	12.474	0.237623762376236	35.28	35.76	0.288	0.068435643564356	1218A
12.474	12.700822	0.39766865647953	35.76	36.662	0.265	0.105382193967075	1218A
12.700822	12.76829	0.263828778087397	36.662	36.84	0.3865	0.101969822730779	1218A
12.76829	12.829	NA	36.84	36.84	0.3865	NA	1218A
12.829	12.887	0.206896551724134	36.84	36.96	0.3865	0.079965517241378	1218A
12.887	13.032	0.331034482758619	36.96	37.44	0.3865	0.127944827586206	1218A
13.032	13.183	0.37748344370861	37.44	38.01	0.276	0.104185430463576	1218A
13.183	13.363	0.244444444444448	38.01	38.45	0.3865	0.094477777777779	1218A
13.363	13.608	0.281632653061222	38.45	39.14	0.249	0.070126530612244	1218A
13.608	14.163	0.210810810810811	39.14	40.31	0.42	0.088540540540541	1218A
14.163	14.609	0.208520179372197	40.31	41.24	0.297	0.061930493273543	1218A
14.609	15.032	0.229314420803782	41.24	42.21	0.279	0.063978723404255	1218A
15.032	15.16	0.312499999999999	42.21	42.61	0.424	0.132499999999999	1218A
15.16	16.303	0.42082239720035	42.61	47.42	0.3175	0.133611111111111	1218A
16.303	16.541219	0.289649440220971	47.42	48.11	0.426	0.123390661534134	1218A
16.541219	16.72043	NA	48.11	48.11	0.413	NA	1218A
16.72043	17.235	0.050527625007287	48.11	48.37	0.413	0.02086790912801	1218A
17.235	17.533	0.24496644295302	48.37	49.1	0.272	0.066630872483221	1218A
17.533	18.056	0.277246653919693	49.1	50.55	0.26	0.07208413001912	1218A
18.056	18.524	0.32905982905983	50.55	52.09	0.249	0.081935897435898	1218A
18.524	18.748	0.36160714285714	52.09	52.9	0.4135	0.149524553571428	1218A
18.748	19.285	0.391061452513967	52.9	55	0.291	0.113798882681565	1218A
19.285	19.6205	1.19225037257824	55	59	0.863	1.02891207153502	1218A
19.6205	20.3707	0.533191149026927	59	63	0.617	0.328978938949614	1218A
20.3707	20.9321	0.712504453152833	63	67	0.627	0.446740292126827	1218A
20.9321	21.3094	1.06016432547044	67	71	0.889	0.942486085343224	1218A
21.3094	21.689011	1.05371024548814	71	75	0.93	0.979950528303973	1218A
21.689011	22.273	0.684944408199471	75	79	0.93	0.636998299625508	1218A
22.273	22.7185	0.897867564534233	79	83	0.667	0.598877665544333	1218A
22.7185	23.180818	0.865205334856095	83	87	0.351	0.303687072534489	1218A
23.180818	23.579	1.00456575133983	87	91	0.816	0.819725653093305	1218A
23.579	24.1668	0.680503572643759	91	95	0.537	0.365430418509698	1218A
24.1668	24.525	1.11669458403127	95	99	0.863	0.963707426018984	1218A
24.525	25.003698	0.83559989805681	99	103	0.8505	0.710677713297317	1218A
25.003698	25.230451	1.76403399293505	103	107	0.88	1.55234991378285	1218A
25.230451	25.686011	0.878040214241808	107	111	0.818	0.718236895249799	1218A
25.686011	25.965237	1.43253135453003	111	115	0.848	1.21478658864147	1218A
25.965237	26.198	1.71848618551916	115	119	0.829	1.42462504779538	1218A
26.198	26.6	0.995024875621888	119	123	0.88	0.875621890547261	1218A
26.6	26.818	1.8348623853211	123	127	0.9745	1.78807339449541	1218A
26.818	27.229288	0.972554511680382	127	131	1.018	0.990060492890629	1218A
27.229288	27.4806	1.59164703635323	131	135	1.047	1.66645444706183	1218A
27.4806	27.730134	1.60298796957528	135	139	1.009	1.61741486130146	1218A
27.730134	28.160124	0.930254191957952	139	143	1.036	0.963743342868439	1218A
28.160124	28.38684	1.76432188288432	143	147	1.048	1.84900933326276	1218A
28.38684	28.68	1.36444262518761	147	151	1.071	1.46131805157593	1218A
28.68	28.959302	1.43214155287108	151	155	0.961	1.37628803230911	1218A
28.959302	29.17258	1.87548645429909	155	159	1.042	1.95425688537965	1218A
29.17258	29.40575	1.71548655487412	159	163	1.08	1.85272547926405	1218A
29.40575	29.664915	1.54341828564814	163	167	0.959	1.48013813593657	1218A
29.664915	29.943	1.43840911951381	167	171	1.009	1.45135480158944	1218A
29.943	30.252	1.29449838187703	171	175	1.1055	1.43106796116506	1218A
30.252	30.629565	1.05942023227788	175	179	1.056	1.11874776528545	1218A
30.629565	31.0615	0.926065264449514	179	183	0.9	0.833458738004562	1218A
31.0615	31.387	1.22887864823348	183	187	0.9865	1.21228878648233	1218A
31.387	31.660711	1.4613954134105	187	191	1.02	1.49062332167871	1218A
31.660711	31.967471	1.30395097144347	191	195	0.3505	0.457034815490937	1218A
31.967471	32.25599	1.38639049767954	195	199	1.03	1.42798221260993	1218A
32.25599	32.527478	1.47336162187645	199	203	0.8785	1.29434818481846	1218A
32.527478	32.8445	1.26174208729996	203	207	0.8685	1.09582300282001	1218A
32.8445	33.288	0.901916572717023	207	211	0.956	0.862232243517474	1218A
33.288	34.000914	0.561077493217972	211	215	1.064	0.596986452783922	1218A
34.000914	34.800773	0.500088140534771	215	219	0.5925	0.296302223266852	1218A
34.800773	35.600632	0.500088140534771	219	223	0.493	0.246543453283642	1218A
35.600632	36.400491	0.500088140534766	223	227	0.2765	0.138274370857863	1218A
36.400491	37.20035	0.500088140534771	227	231	0.6205	0.310304691201825	1218A
37.20035	38.000209	0.500088140534771	231	235	0.874	0.437077034827389	1218A
38.000209	38.791667	0.505396369737877	235	239	0.7665	0.387386317404083	1218A
38.791667	39.313315	0.766800601171662	239	243	0.947	0.726160169309564	1218A
39.313315	39.720904	0.981380753651363	243	247	0.598	0.586865690683515	1218A
39.720904	40.128492	0.981383161427707	247	251	0.52	0.510319243942407	1218A
40.128492	40.536081	0.981380753651346	251	255	0.264	0.259084518963955	1218A
40.536081	40.792412	1.56048234509289	255	259	0.8785	1.37088374016411	1218A
40.792412	40.947176	2.58458039337313	259	263	0.97	2.50704298157194	1218A
40.947176	41.181506	1.70699440959331	263	267	0.972	1.6591985661247	1218A
4.187	4.3	0.442477876106196	15.17	15.67	NA	NA	1218B
4.3	4.493	0.419689119170984	15.67	16.48	NA	NA	1218B
4.493	4.631	0.144927536231884	16.48	16.68	NA	NA	1218B
4.631	4.799	0.178571428571429	16.68	16.98	NA	NA	1218B
4.799	4.896	0.164948453608248	16.98	17.14	NA	NA	1218B
4.896	4.997	0.247524752475248	17.14	17.39	NA	NA	1218B
4.997	5.235	0.19327731092437	17.39	17.85	NA	NA	1218B
5.235	6.033	0.226817042606516	17.85	19.66	NA	NA	1218B
6.033	6.252	0.347031963470321	19.66	20.42	NA	NA	1218B
6.252	6.436	0.22282608695652	20.42	20.83	NA	NA	1218B
6.436	6.733	0.353535353535354	20.83	21.88	NA	NA	1218B
6.733	7.695	0.378378378378378	21.88	25.52	NA	NA	1218B
7.695	8.108	0.271186440677966	25.52	26.64	NA	NA	1218B
8.108	8.771	0.075414781297134	26.64	27.14	NA	NA	1218B
8.771	9.105	0.182634730538922	27.14	27.75	NA	NA	1218B
9.105	9.311	0.16990291262136	27.75	28.1	NA	NA	1218B
9.311	9.426	0.217391304347826	28.1	28.35	NA	NA	1218B
9.426	9.786	0.113888888888889	28.35	28.76	NA	NA	1218B
9.786	11.056	0.204724409448819	28.76	31.36	NA	NA	1218B
11.056	11.592	0.242537313432835	31.36	32.66	NA	NA	1218B
11.592	11.78355	NA	32.66	32.66	NA	NA	1218B
11.78355	12.174	0.268920476373417	32.66	33.71	NA	NA	1218B
12.174	12.272	0.336734693877547	33.71	34.04	NA	NA	1218B
12.272	12.474	0.23762376237624	34.04	34.52	NA	NA	1218B
12.474	12.735	0.402298850574713	34.52	35.57	NA	NA	1218B
12.735	12.77	0.342857142857134	35.57	35.69	NA	NA	1218B
12.77	12.829	0.491525423728803	35.69	35.98	NA	NA	1218B
12.829	12.887	0.206896551724146	35.98	36.1	NA	NA	1218B
12.887	13.032	0.331034482758619	36.1	36.58	NA	NA	1218B
13.032	13.183	0.37748344370861	36.58	37.15	NA	NA	1218B
13.183	13.363	0.244444444444448	37.15	37.59	NA	NA	1218B
13.363	13.608	0.281632653061222	37.59	38.28	NA	NA	1218B
13.608	14.163	0.210810810810811	38.28	39.45	NA	NA	1218B
14.163	14.609	0.208520179372197	39.45	40.38	NA	NA	1218B
14.609	15.032	0.229314420803782	40.38	41.35	NA	NA	1218B
15.032	15.16	0.312499999999999	41.35	41.75	NA	NA	1218B
15.16	16.303	0.245844269466317	41.75	44.56	NA	NA	1218B
16.303	16.472	0.195266272189348	44.56	44.89	NA	NA	1218B
16.472	16.543	0.507042253521141	44.89	45.25	NA	NA	1218B
16.543	16.721	0.224719101123594	45.25	45.65	NA	NA	1218B
16.721	17.235	0.369649805447471	45.65	47.55	NA	NA	1218B
17.235	17.533	0.24496644295302	47.55	48.28	NA	NA	1218B
17.533	18.056	0.277246653919693	48.28	49.73	NA	NA	1218B
18.056	18.524	0.408119658119659	49.73	51.64	NA	NA	1218B
18.524	18.748	0.361607142857144	51.64	52.45	NA	NA	1218B
18.748	19.0058	0.989138867339023	52.45	55	NA	NA	1218B
19.0058	19.645123	0.625661832907622	55	59	NA	NA	1218B
19.645123	20.4133	0.520713325184171	59	63	NA	NA	1218B
20.4133	20.9527	0.741564701520207	63	67	NA	NA	1218B
20.9527	21.342429	1.02635421023327	67	71	NA	NA	1218B
21.342429	21.685	1.16764116051855	71	75	NA	NA	1218B
21.685	22.265	0.689655172413791	75	79	NA	NA	1218B
22.265	22.722	0.875273522975929	79	83	NA	NA	1218B
22.722	23.168	0.896860986547089	83	87	NA	NA	1218B
23.168	23.585	0.959232613908869	87	91	NA	NA	1218B
23.585	24.176	0.676818950930629	91	95	NA	NA	1218B
24.176	24.526	1.14285714285714	95	99	NA	NA	1218B
24.526	25.008	0.8298755186722	99	103	NA	NA	1218B
25.008	25.281492	1.46256563263276	103	107	NA	NA	1218B
25.281492	25.675	1.01649775862244	107	111	NA	NA	1218B
25.675	25.978	1.32013201320132	111	115	NA	NA	1218B
25.978	26.20718	1.74535299764378	115	119	NA	NA	1218B
26.20718	26.6	1.01827809174686	119	123	NA	NA	1218B
26.6	26.825166	1.7764671397991	123	127	NA	NA	1218B
26.825166	27.22975	0.988669843592431	127	131	NA	NA	1218B
27.22975	27.4915	1.52817574021013	131	135	NA	NA	1218B
27.4915	27.7385	1.61943319838057	135	139	NA	NA	1218B
27.7385	28.1555	0.959232613908869	139	143	NA	NA	1218B
28.1555	28.3812	1.77226406734604	143	147	NA	NA	1218B
28.3812	28.6605	1.43215180809166	147	151	NA	NA	1218B
28.6605	28.955128	1.35764421575682	151	155	NA	NA	1218B
28.955128	29.12265	2.38774608708108	155	159	NA	NA	1218B
29.12265	29.405	1.41668142376483	159	163	NA	NA	1218B
29.405	29.708137	1.31953539158862	163	167	NA	NA	1218B
29.708137	30.001174	1.36501533935988	167	171	NA	NA	1218B
30.001174	30.294211	1.36501533935987	171	175	NA	NA	1218B
30.294211	30.633	1.18067587790631	175	179	NA	NA	1218B
30.633	31.076345	0.902231896153107	179	183	NA	NA	1218B
31.076345	31.38163	1.3102510768626	183	187	NA	NA	1218B
31.38163	31.651705	1.48107007312784	187	191	NA	NA	1218B
31.651705	31.979513	1.22022647403358	191	195	NA	NA	1218B
31.979513	32.250434	1.4764451629811	195	199	NA	NA	1218B
32.250434	32.5248	1.45790659192465	199	203	NA	NA	1218B
32.5248	32.906623	1.04760582783121	203	207	NA	NA	1218B
32.906623	33.277874	1.07743817525072	207	211	NA	NA	1218B
33.277874	33.714482	0.916153620639109	211	215	NA	NA	1218B
33.714482	34.741547	0.389459284465929	215	219	NA	NA	1218B
34.741547	35.569321	0.483223681826196	219	223	NA	NA	1218B
35.569321	36.829595	0.317391297448016	223	227	NA	NA	1218B
36.829595	37.382274	0.723747419388101	227	231	NA	NA	1218B
37.382274	38.372543	0.403930649146849	231	235	NA	NA	1218B
38.372543	39.226755	0.468267830468316	235	239	NA	NA	1218B
39.226755	39.900377	0.593804834165153	239	243	NA	NA	1218B
39.900377	40.349127	0.891364902506956	243	247	NA	NA	1218B
19.772	20.04	0.858208955223877	58.89	61.19	NA	NA	1218C
20.04	20.213	0.612716763005775	61.19	62.25	NA	NA	1218C
20.213	20.439	0.482300884955756	62.25	63.34	NA	NA	1218C
20.439	20.709	0.659259259259261	63.34	65.12	NA	NA	1218C
20.709	21.083	0.360962566844919	65.12	66.47	NA	NA	1218C
21.083	21.159	2.98684210526313	66.47	68.74	NA	NA	1218C
21.159	21.659	1.078	68.74	74.13	NA	NA	1218C
21.659	21.688	1.37931034482761	74.13	74.53	NA	NA	1218C
21.688	21.767	0.93670886075948	74.53	75.27	NA	NA	1218C
21.767	21.936	0.739644970414199	75.27	76.52	NA	NA	1218C
21.936	21.992	0.785714285714268	76.52	76.96	NA	NA	1218C
21.992	22.268	1.08333333333334	76.96	79.95	NA	NA	1218C
22.268	22.902	0.842271293375394	79.95	85.29	NA	NA	1218C
22.902	23.233	0.577039274924471	85.29	87.2	NA	NA	1218C
23.233	23.295	2.03225806451608	87.2	88.46	NA	NA	1218C
23.295	23.962	1.01349325337332	88.46	95.22	NA	NA	1218C
23.962	25.099	0.635883905013193	95.22	102.45	NA	NA	1218C
25.099	25.987	1.67680180180181	102.45	117.34	NA	NA	1218C
25.987	26.42	1.2609699769053	117.34	122.8	NA	NA	1218C
26.42	27.43	1.28316831683168	122.8	135.76	NA	NA	1218C
27.43	27.592	1.38271604938273	135.76	138	NA	NA	1218C
27.592	28.101033	0.785803670881845	138	142	NA	NA	1218C
28.101033	28.2945	2.06753606558226	142	146	NA	NA	1218C
28.2945	28.6015	1.3029315960912	146	150	NA	NA	1218C
28.6015	28.879469	1.43900938593873	150	154	NA	NA	1218C
28.879469	29.072	2.07758750538875	154	158	NA	NA	1218C
29.072	29.321	1.60642570281123	158	162	NA	NA	1218C
29.321	29.608	1.39372822299652	162	166	NA	NA	1218C
29.608	29.852	1.63934426229508	166	170	NA	NA	1218C
29.852	30.170669	1.25522093457475	170	174	NA	NA	1218C
30.170669	30.489192	1.2557962847267	174	178	NA	NA	1218C
30.489192	30.824417	1.19322842866731	178	182	NA	NA	1218C
30.824417	31.159643	1.19322486919273	182	186	NA	NA	1218C
31.159643	31.494868	1.19322842866731	186	190	NA	NA	1218C
31.494868	31.808302	1.27618573607202	190	194	NA	NA	1218C
31.808302	32.091865	1.41062127287412	194	198	NA	NA	1218C
32.091865	32.449116	1.1196609666593	198	202	NA	NA	1218C
32.449116	32.82397	1.06708211730432	202	206	NA	NA	1218C
32.82397	33.189343	1.09477164431965	206	210	NA	NA	1218C
33.189343	33.529995	1.17421885090944	210	214	NA	NA	1218C
33.529995	33.921295	1.02223358037311	214	218	NA	NA	1218C
33.921295	34.930031	0.396535862703423	218	222	NA	NA	1218C
34.930031	35.824192	0.447346730622339	222	226	NA	NA	1218C
35.824192	36.607962	0.51035380277377	226	230	NA	NA	1218C
36.607962	37.36654	0.527302400016874	230	234	NA	NA	1218C
37.36654	38.212472	0.472851245726608	234	238	NA	NA	1218C
38.212472	39.058404	0.472851245726604	238	242	NA	NA	1218C
39.058404	39.904336	0.472851245726608	242	246	NA	NA	1218C
39.904336	40.496493	0.675496532169678	246	250	NA	NA	1218C
40.496493	40.67924	2.18881842109584	250	254	NA	NA	1218C
0	1.04788	0.115948391037142	0	1.215	0.277	0.032117704317288	1219A
1.04788	1.972976	0.110150730302585	1.215	2.234	0.276	0.030401601563513	1219A
1.972976	4.159565	0.111909462637926	2.234	4.681	0.258	0.028872641360585	1219A
4.159565	4.622112	0.132094684432068	4.681	5.292	0.27	0.035665564796658	1219A
4.622112	6.009755	0.102836248228111	5.292	6.719	0.286	0.02941116699324	1219A
6.009755	6.724602	0.099881513107001	6.719	7.433	0.314	0.031362795115598	1219A
6.724602	7.229199	0.242371635186099	7.433	8.656	0.276	0.066894571311363	1219A
7.229199	8.028145	0.076600921714359	8.656	9.268	0.295	0.022597271905736	1219A
8.028145	9.712674	0.060491686400175	9.268	10.287	0.321	0.019417831334456	1219A
9.712674	10.943588	0.140789689612759	10.287	12.02	0.285	0.040125061539636	1219A
10.943588	15.007345	0.205671746612802	12.02	20.378	0.2605	0.053577489992635	1219A
15.007345	15.975555	0.284339141301991	20.378	23.131	0.3065	0.08714994680906	1219A
15.975555	16.732451	0.242305415803492	23.131	24.965	0.2915	0.070632028706718	1219A
16.732451	17.194999	0.162361527884674	24.965	25.716	0.2565	0.041645731902419	1219A
17.194999	18.035995	0.181808236900056	25.716	27.245	0.283	0.051451731042716	1219A
18.035995	18.498542	0.286457376223389	27.245	28.57	0.266	0.076197662075421	1219A
18.498542	18.750841	0.161712888279383	28.57	28.978	0.252	0.040751647846405	1219A
18.750841	19.760036	0.353549115879488	28.978	32.546	0.666	0.235463711175739	1219A
19.760036	22.577372	0.528939395230104	32.546	47.448	0.802	0.424209394974543	1219A
22.577372	23.296314	0.923440277518912	47.448	54.087	0.821	0.758144467843027	1219A
23.296314	23.925175	0.470056180936645	54.087	57.043	0.6445	0.302951208613667	1219A
23.925175	24.12039	0.57423865993904	57.043	58.164	0.657	0.377274799579949	1219A
24.12039	24.471875	0.609129834843591	58.164	60.305	0.7105	0.432786747656372	1219A
24.471875	24.738159	0.4209791050157	60.305	61.426	0.2915	0.122715409112077	1219A
24.738159	25.293006	0.558171892431607	61.426	64.523	0.807	0.450444717192307	1219A
25.293006	26.444101	1.05377922760502	64.523	76.653	0.73	0.769258836151664	1219A
26.444101	27.407427	1.19492259110623	76.653	88.164	0.866	1.034802963898	1219A
27.407427	28.240987	0.651542780363739	88.164	93.595	0.866	0.564236047794998	1219A
28.240987	29.234508	1.6120444359002	93.595	109.611	1.031	1.6620178134131	1219A
29.234508	30.556491	0.817332749362132	109.611	120.416	1.004	0.820602080359581	1219A
30.556491	31.00986	1.07925332345176	120.416	125.309	0.7595	0.819692899161613	1219A
31.00986	33.141615	1.22378040628496	125.309	151.397	0.8135	0.995545360512816	1219A
33.141615	34.685932	NA	151.397	151.397	0.7765	NA	1219A
34.685932	36.166674	0.717207994370391	151.397	162.017	0.393	0.281862741787564	1219A
36.166674	36.954484	0.519795382135286	162.017	166.112	0.3985	0.207138459780912	1219A
36.954484	37.873456	0.522105134868094	166.112	170.91	0.404	0.21093047448671	1219A
37.873456	38.150818	0.586958559571965	170.91	172.538	0.383	0.224805128316063	1219A
38.150818	38.619107	0.532150018471499	172.538	175.03	0.393	0.209134957259299	1219A
38.619107	39.633889	0.69335088718562	175.03	182.066	0.422	0.292594074392331	1219A
39.633889	39.697464	0.880849390483781	182.066	182.626	0.7445	0.655792371215175	1219A
39.697464	40.134636	0.837656574529012	182.626	186.288	0.417	0.349302791578598	1219A
40.134636	41.199138	0.992482869924155	186.288	196.853	0.437	0.433715014156856	1219A
41.199138	41.378593	1.3635730405951	196.853	199.3	0.53	0.722693711515405	1219A
41.378593	42.296993	0.632621951219514	199.3	205.11	0.4545	0.287526676829269	1219A
42.296993	43.434449	0.872649139834858	205.11	215.036	0.503	0.438942517336934	1219A
43.434449	44.77072	0.640738293355168	215.036	223.598	0.5135	0.329019113637879	1219A
44.77072	55.613602	0.189497589294064	223.598	244.145	0.544	0.103086688575971	1219A
15.77484	15.975555	0.284482973370201	21	21.571	NA	NA	1219B
15.975555	16.732451	0.242305415803492	21.571	23.405	NA	NA	1219B
16.732451	17.194999	0.352612053235558	23.405	25.036	NA	NA	1219B
17.194999	18.035995	0.181808236900056	25.036	26.565	NA	NA	1219B
18.035995	18.498542	0.286457376223389	26.565	27.89	NA	NA	1219B
18.498542	18.750841	0.161712888279381	27.89	28.298	NA	NA	1219B
18.750841	19.760036	0.353549115879489	28.298	31.866	NA	NA	1219B
19.760036	22.577372	0.539232807162511	31.866	47.058	NA	NA	1219B
22.577372	23.296314	0.584052677406523	47.058	51.257	NA	NA	1219B
23.296314	23.925175	0.470056180936646	51.257	54.213	NA	NA	1219B
23.925175	24.12039	0.57423865993904	54.213	55.334	NA	NA	1219B
24.12039	24.471875	0.609129834843591	55.334	57.475	NA	NA	1219B
24.471875	24.738159	0.631280888074388	57.475	59.156	NA	NA	1219B
24.738159	25.293006	0.734797160298246	59.156	63.233	NA	NA	1219B
25.293006	26.444101	0.911306191061553	63.233	73.723	NA	NA	1219B
26.444101	27.407427	1.19388452092023	73.723	85.224	NA	NA	1219B
27.407427	28.240987	1.10022073995873	85.224	94.395	NA	NA	1219B
28.240987	29.234508	1.63821398843104	94.395	110.671	NA	NA	1219B
29.234508	30.556491	1.12747289488594	110.671	125.576	NA	NA	1219B
30.556491	31.00986	1.07925332345176	125.576	130.469	NA	NA	1219B
31.00986	32.09431	2.53409562451012	130.469	157.95	NA	NA	1219B
20.012289	21.127457	0.273142701368762	20.021	23.067	0.242	0.06610053373124	1220A
21.127457	21.686754	0.335778665002673	23.067	24.945	0.465	0.156137079226243	1220A
21.686754	22.884123	0.299656997968045	24.945	28.533	0.313	0.093792640363998	1220A
22.884123	23.518256	NA	28.533	28.533	0.347	NA	1220A
23.518256	25.26225	0.304416184918067	28.533	33.842	0.2885	0.087824069348862	1220A
25.26225	25.992832	0.443892677344913	33.842	37.085	0.2635	0.116965720480384	1220A
25.992832	26.422939	0.231802783958411	37.085	38.082	0.296	0.06861362405169	1220A
26.422939	27.889244	0.229624805207647	38.082	41.449	0.4755	0.109186594876236	1220A
27.889244	28.204813	0.828978765341336	41.449	44.065	0.762	0.631681819190098	1220A
28.204813	29.167435	0.44898205110625	44.065	48.387	0.7225	0.324389531924265	1220A
29.167435	29.433692	0.66552240880052	48.387	50.159	0.896	0.596308078285266	1220A
29.433692	30.597068	0.386719340952539	50.159	54.658	0.698	0.269930099984872	1220A
30.597068	31.051715	0.302212485730686	54.658	56.032	0.441	0.133275706207232	1220A
31.051715	33.181772	0.525385001434234	56.032	67.223	0.694	0.364617190995358	1220A
33.181772	33.749461	0.382956160855685	67.223	69.397	0.835	0.319768394314497	1220A
33.749461	35.366073	0.4090035209438	69.397	76.009	0.309	0.126382087971634	1220A
35.366073	36.093548	0.407436681672911	76.009	78.973	0.298	0.121416131138527	1220A
36.093548	37.0231	0.574577861163226	78.973	84.314	0.2975	0.17093691369606	1220A
37.0231	38.639711	0.530739924446884	84.314	92.894	0.306	0.162406416880747	1220A
38.639711	39.811755	0.685810430325141	92.894	100.932	0.307	0.210543802109818	1220A
39.811755	40.18638	0.969235902569231	100.932	104.563	0.285	0.276232232232231	1220A
40.18638	41.185874	0.541674087088068	104.563	109.977	0.3095	0.167648129953757	1220A
41.185874	41.428366	0.524553387328241	109.977	111.249	0.619	0.324698546756181	1220A
41.428366	41.97396	0.572037082519236	111.249	114.37	0.336	0.192204459726463	1220A
25.26225	26.393878	0.426995443732393	36.042	40.874	NA	NA	1220B
26.393878	27.889244	0.255121488652276	40.874	44.689	NA	NA	1220B
27.889244	28.293397	0.113075988548892	44.689	45.146	NA	NA	1220B
28.293397	29.505856	0.692229592918192	45.146	53.539	NA	NA	1220B
29.505856	30.597068	0.281246907108793	53.539	56.608	NA	NA	1220B
30.597068	31.243713	0.314546621407419	56.608	58.642	NA	NA	1220B
31.243713	33.102816	0.549028214144134	58.642	68.849	NA	NA	1220B
33.102816	33.749461	0.432694909881002	68.849	71.647	NA	NA	1220B
33.749461	35.366073	0.344052871066155	71.647	77.209	NA	NA	1220B
35.366073	36.093548	0.524279184851713	77.209	81.023	NA	NA	1220B
36.093548	37.0231	0.380936192918739	81.023	84.564	NA	NA	1220B
37.0231	38.639711	0.582081898490114	84.564	93.974	NA	NA	1220B
38.639711	39.811755	0.55953530754818	93.974	100.532	NA	NA	1220B
39.811755	40.135077	0.779099473589787	100.532	103.051	NA	NA	1220B
40.135077	41.286329	0.852984403067269	103.051	112.871	0.318	0.271249040175392	1220B
41.286329	42.317502	0.524063372489392	112.871	118.275	0.314	0.164555898961669	1220B
42.317502	43.529961	0.947660910595736	118.275	129.765	0.3175	0.300882339114146	1220B
43.529961	45.614029	0.916524796695694	129.765	148.866	0.348	0.318950629250101	1220B
45.614029	47.269592	0.946807823078915	148.866	164.541	0.4455	0.421802885181657	1220B
47.269592	51.423022	NA	164.541	164.541	NA	NA	1220B
51.423022	55.547407	0.853945497328693	164.541	199.761	0.635	0.54225539080372	1220B
20.420403	26.388228	0.30788436323116	22.478	40.852	NA	NA	1220C
26.388228	27.889244	0.255626855409936	40.852	44.689	NA	NA	1220C
27.889244	28.183633	0.822720957644479	44.689	47.111	NA	NA	1220C
28.183633	29.47329	0.54797515928654	47.111	54.178	NA	NA	1220C
29.47329	30.282487	0.324272087019601	54.178	56.802	NA	NA	1220C
30.282487	31.041109	0.29276767612856	56.802	59.023	NA	NA	1220C
31.041109	33.102816	0.476595364908787	59.023	68.849	NA	NA	1220C
33.102816	33.749461	0.432694909881002	68.849	71.647	NA	NA	1220C
33.749461	35.264104	0.40630036252767	71.647	77.801	NA	NA	1220C
35.264104	36.093548	0.38845298778459	77.801	81.023	NA	NA	1220C
36.093548	36.983646	0.454669036443177	81.023	85.07	NA	NA	1220C
36.983646	38.639711	0.53766005561376	85.07	93.974	NA	NA	1220C
38.639711	39.722317	0.625342922540611	93.974	100.744	NA	NA	1220C
39.722317	40.093212	0.892435864597787	100.744	104.054	NA	NA	1220C
40.093212	41.317164	0.835735388315884	104.054	114.283	NA	NA	1220C
41.317164	42.392758	0.61547386839272	114.283	120.903	NA	NA	1220C
42.392758	43.394173	1.05151211036383	120.903	131.433	NA	NA	1220C
43.394173	45.614029	0.785321210024435	131.433	148.866	NA	NA	1220C
45.614029	47.993265	0.898607788382489	148.866	170.246	NA	NA	1220C
47.993265	51.294227	NA	170.246	170.246	NA	NA	1220C
51.294227	54.891904	0.819584415165675	170.246	199.732	NA	NA	1220C
0	0.507906	1.51366591455899	0	7.688	1.0616	1.60690773489583	125
0.507906	1.935588	1.83773417329629	7.688	33.925	1.0903	2.00368156914495	125
1.935588	2.505606	0.528228933121411	33.925	36.936	1.0662	0.563197688494048	125
2.505606	2.885194	1.07643023488625	36.936	41.022	1.0662	1.14768991643572	125
2.885194	3.126111	2.85617038233084	41.022	47.903	1.0662	3.04524886164115	125
3.126111	3.275745	8.47935629602896	47.903	60.591	1.0662	9.04068968282608	125
3.275745	4.70827	NA	60.591	60.591	1.0662	NA	125
4.70827	4.943894	2.19077852850303	60.591	65.753	1.0662	2.33580806708993	125
0	0.430575	1.70237473146374	0	7.33	0.2098	0.357158218661093	1256B
0.430575	0.780447	0.565921251200439	7.33	9.31	0.2501	0.14153690492523	1256B
0.780447	1.072007	1.06667581286871	9.31	12.42	0.21855	0.233121998902456	1256B
1.072007	1.760088	0.698754943095362	12.42	17.228	0.2604	0.181955787182032	1256B
1.760088	2.144947	0.80808815696138	17.228	20.338	0.22915	0.1851734011677	1256B
2.144947	2.564793	0.606412827560582	20.338	22.884	0.2863	0.173615992530595	1256B
2.564793	3.031288	0.606223003461988	22.884	25.712	0.30095	0.182442812891885	1256B
3.031288	3.311186	0.201859248726322	25.712	26.277	0.2536	0.051191505476995	1256B
3.311186	3.602746	0.77582658800933	26.277	28.539	0.3322	0.2577295925367	1256B
3.602746	4.174203	0.74231306992477	28.539	32.781	0.2513	0.186543274472095	1256B
4.174203	4.302489	0.881623871661761	32.781	33.912	0.3284	0.289525279453722	1256B
4.302489	4.617374	0.538926909824222	33.912	35.609	0.3629	0.19557657557521	1256B
4.617374	4.885609	0.421645199172368	35.609	36.74	0.24535	0.10345064961694	1256B
4.885609	5.013895	0.661802534960943	36.74	37.589	0.3107	0.205622047612365	1256B
5.013895	5.247143	0.84845314858005	37.589	39.568	0.4325	0.366955986760871	1256B
5.247143	6.040185	1.24810539668769	39.568	49.466	0.29845	0.372497055641442	1256B
6.040185	6.425044	0.514474132084737	49.466	51.446	0.3959	0.203680308892347	1256B
6.425044	6.739929	1.52658907220096	51.446	56.253	0.28485	0.434848897216444	1256B
6.739929	7.707907	1.69445999805781	56.253	72.655	0.3113	0.527485397395396	1256B
7.707907	8.104428	0.998433878659641	72.655	76.614	0.4127	0.412053661722834	1256B
8.104428	8.769185	0.978402634346083	76.614	83.118	0.278	0.271995932348211	1256B
8.769185	9.095732	0.519680168551542	83.118	84.815	0.3214	0.167025206172466	1256B
9.095732	9.433941	0.585436815696803	84.815	86.795	0.2588	0.151511047902332	1256B
9.433941	9.643864	0.673580312781354	86.795	88.209	0.2336	0.157348361065724	1256B
9.643864	9.795475	1.30531425820027	88.209	90.188	0.2463	0.321498901794727	1256B
9.795475	9.923761	0.661802534960944	90.188	91.037	0.2538	0.167965483373088	1256B
9.923761	9.993736	2.02072168631654	91.037	92.451	0.196	0.396061450518042	1256B
9.993736	10.798441	1.82737773469781	92.451	107.156	0.34585	0.631998589545237	1256B
10.798441	13.52744	3.86519013015395	107.156	212.637	0.7474	2.88884310327706	1256B
46.249999	60.046542	1.69713528961567	11.154	245.3	1.1656	1.97818089357602	1258A
60.046542	65.864361	NA	245.3	245.3	1.0536	NA	1258A
65.864361	76.715543	1.25696905645855	245.3	381.696	1.5745	1.97909777939399	1258A
76.715543	107.586437	0.210502488201346	381.696	446.68	1.4718	0.309817562134741	1258A
45.548906	60.804521	1.53319286046482	11.402	245.3	1.1478	1.75979876524152	1258B
60.804521	66.36377	NA	245.3	245.3	1.01465	NA	1258B
66.36377	76.70656	1.39781432282779	245.3	389.873	1.5579	2.17765493353341	1258B
76.70656	103.080674	0.260255188098451	389.873	458.513	1.4054	0.365762641353563	1258B
64.618793	81.79521	0.907430228318281	245.413	401.277	NA	NA	1258C
81.79521	107.726059	0.186044814807259	401.277	449.52	NA	NA	1258C
29.12665	35.289409	0.559489670129888	3.52	38	1.14805	0.642322115792618	1260A
35.289409	39.786	NA	38	38	0.9436	NA	1260A
39.786	40.094	2.08441558441559	38	44.42	0.8135	1.69567207792208	1260A
40.094	40.122	2.21428571428581	44.42	45.04	0.7564	1.67488571428579	1260A
40.122	40.145	1.91304347826059	45.04	45.48	0.81885	1.56649565217368	1260A
40.145	40.165	1.90000000000039	45.48	45.86	0.81885	1.55581500000032	1260A
40.165	40.188	1.56521739130412	45.86	46.22	0.81885	1.28167826086938	1260A
40.188	40.209	1.80952380952375	46.22	46.6	0.81885	1.48172857142853	1260A
40.209	40.234	1.52000000000007	46.6	46.98	0.74345	1.13004400000005	1260A
40.234	40.257	1.73913043478293	46.98	47.38	0.7082	1.23165217391327	1260A
40.257	40.278	1.61904761904754	47.38	47.72	0.7082	1.14660952380947	1260A
40.278	40.3	1.81818181818194	47.72	48.12	0.9017	1.63945454545465	1260A
40.3	40.323	1.65217391304326	48.12	48.5	0.7082	1.17006956521723	1260A
40.323	40.348	1.5200000000001	48.5	48.88	0.7082	1.07646400000007	1260A
40.348	40.37	1.81818181818194	48.88	49.28	0.9201	1.6729090909092	1260A
40.37	40.39	1.99999999999968	49.28	49.68	0.7082	1.41639999999977	1260A
40.39	40.411	1.90476190476183	49.68	50.08	0.7082	1.34895238095232	1260A
40.411	40.429	1.99999999999992	50.08	50.44	0.7082	1.41639999999994	1260A
40.429	40.445	2.00000000000022	50.44	50.76	0.7082	1.41640000000016	1260A
40.445	40.465	2.09999999999968	50.76	51.18	0.9794	2.05673999999969	1260A
40.465	40.484	1.47368421052645	51.18	51.46	0.7082	1.04366315789483	1260A
40.484	40.5	2.12500000000021	51.46	51.8	0.7082	1.50492500000015	1260A
40.5	40.518	1.88888888888884	51.8	52.14	0.7082	1.33771111111107	1260A
40.518	40.538	1.80000000000036	52.14	52.5	1.1937	2.14866000000042	1260A
40.538	40.559	1.61904761904757	52.5	52.84	0.7082	1.14660952380949	1260A
40.559	40.582	1.56521739130412	52.84	53.2	0.7082	1.10848695652158	1260A
40.582	40.607	1.52000000000007	53.2	53.58	0.7082	1.07646400000005	1260A
40.607	40.63	2.08695652173885	53.58	54.06	0.7082	1.47798260869546	1260A
40.63	40.651	1.9999999999999	54.06	54.48	1.0755	2.15099999999989	1260A
40.651	40.672	2.28571428571499	54.48	54.96	0.7082	1.61874285714336	1260A
40.672	40.695	1.99999999999972	54.96	55.42	0.7082	1.4163999999998	1260A
40.695	40.72	1.6800000000001	55.42	55.84	0.7082	1.18977600000007	1260A
40.72	40.742	1.81818181818194	55.84	56.24	0.7082	1.28763636363645	1260A
40.742	40.808	2.21212121212113	56.24	57.7	0.7082	1.56662424242418	1260A
40.808	40.835	1.85185185185178	57.7	58.2	0.9209	1.70537037037031	1260A
40.835	40.856	1.90476190476183	58.2	58.6	0.7082	1.34895238095232	1260A
40.856	40.875	2.00000000000015	58.6	58.98	0.7082	1.41640000000011	1260A
40.875	40.893	2.66666666666659	58.98	59.46	0.7082	1.88853333333328	1260A
40.893	40.911	2.99999999999988	59.46	60	1.0096	3.02879999999988	1260A
40.911	40.931	2.20000000000043	60	60.44	0.7082	1.5580400000003	1260A
40.931	40.952	2.09523809523804	60.44	60.88	0.7082	1.48384761904758	1260A
40.952	40.975	2.34782608695619	60.88	61.42	0.9334	2.19146086956491	1260A
40.975	41.002	2.22222222222214	61.42	62.02	0.8794	1.95422222222215	1260A
41.002	41.023	3.0476190476189	62.02	62.66	0.7082	2.15832380952371	1260A
41.023	41.044	3.42857142857249	62.66	63.38	0.7082	2.42811428571504	1260A
41.044	41.066	3.36363636363552	63.38	64.12	0.9424	3.16989090909012	1260A
41.066	41.092	2.53846153846189	64.12	64.78	0.7082	1.79773846153871	1260A
41.092	41.115	2.86956521739089	64.78	65.44	0.7082	2.03222608695622	1260A
41.115	41.136	7.71428571428544	65.44	67.06	0.7082	5.46325714285695	1260A
41.136	41.156	1.60000000000028	67.06	67.38	0.7082	1.1331200000002	1260A
41.156	41.177	1.99999999999993	67.38	67.8	1.0443	2.08859999999993	1260A
41.177	41.207	2.59999999999991	67.8	68.58	0.7082	1.84131999999993	1260A
41.207	41.228	2.76190476190465	68.58	69.16	0.9587	2.64783809523799	1260A
41.228	41.247	3.15789473684242	69.16	69.76	0.7082	2.2364210526318	1260A
41.247	41.267	2.69999999999954	69.76	70.3	0.7082	1.91213999999967	1260A
41.267	41.285	3.11111111111223	70.3	70.86	0.9829	3.05791111111222	1260A
41.285	41.304	2.73684210526235	70.86	71.38	0.7082	1.9382315789468	1260A
41.304	41.323	2.84210526315817	71.38	71.92	0.7082	2.01277894736862	1260A
41.323	41.342	2.3157894736844	71.92	72.36	1.0798	2.50058947368441	1260A
41.342	41.358	2.50000000000031	72.36	72.76	0.7082	1.77050000000022	1260A
41.358	41.377	2.42105263157822	72.76	73.22	0.7082	1.71458947368369	1260A
41.377	41.396	2.73684210526337	73.22	73.74	0.7082	1.93823157894752	1260A
41.396	41.417	2.5714285714285	73.74	74.28	0.7082	1.82108571428567	1260A
41.417	41.438	3.04761904761893	74.28	74.92	0.7082	2.15832380952373	1260A
41.438	41.467	2.00000000000025	74.92	75.5	1.0511	2.10220000000026	1260A
41.467	41.55	2.14457831325305	75.5	77.28	0.7082	1.51879036144581	1260A
41.55	41.581	2.1290322580641	77.28	77.94	0.9772	2.08049032258024	1260A
41.581	41.602	3.14285714285807	77.94	78.6	0.7082	2.22577142857209	1260A
41.602	41.622	1.99999999999972	78.6	79	1.0936	2.18719999999969	1260A
41.622	41.642	1.89999999999968	79	79.38	0.7082	1.34557999999977	1260A
41.642	41.66	2.4444444444453	79.38	79.82	0.7082	1.73115555555616	1260A
41.66	41.677	2.3529411764702	79.82	80.22	0.978	2.30117647058786	1260A
41.677	41.696	2.00000000000015	80.22	80.6	0.7082	1.41640000000011	1260A
41.696	41.716	1.99999999999972	80.6	81	0.7082	1.4163999999998	1260A
41.716	41.735	2.10526315789495	81	81.4	0.7082	1.4909473684212	1260A
41.735	41.752	2.23529411764664	81.4	81.78	0.7082	1.58303529411735	1260A
41.752	41.77	2.11111111111101	81.78	82.16	0.9526	2.01104444444434	1260A
41.77	41.79	2.5000000000005	82.16	82.66	0.7381	1.84525000000037	1260A
41.79	41.81	2.69999999999961	82.66	83.2	0.7381	1.99286999999971	1260A
41.81	41.831	2.19047619047608	83.2	83.66	1.0838	2.37403809523797	1260A
41.831	41.861	2.46666666666719	83.66	84.4	0.7381	1.82064666666705	1260A
41.861	41.882	2.28571428571415	84.4	84.88	0.913	2.08685714285702	1260A
41.882	41.902	2.69999999999961	84.88	85.42	0.7381	1.99286999999971	1260A
41.902	41.923	4.95238095238073	85.42	86.46	0.7381	3.65535238095221	1260A
41.923	41.944	2.76190476190472	86.46	87.04	0.7381	2.03856190476187	1260A
41.944	41.974	2.00000000000038	87.04	87.64	1.0234	2.04680000000039	1260A
41.974	41.994	2.79999999999957	87.64	88.2	0.7381	2.06667999999968	1260A
41.994	42.015	2.28571428571422	88.2	88.68	1.1054	2.5266285714285	1260A
42.015	42.035	2.5000000000005	88.68	89.18	0.7381	1.84525000000037	1260A
42.035	42.07	2.11428571428548	89.18	89.92	0.7381	1.56055428571411	1260A
42.07	42.089	1.89473684210542	89.92	90.28	1.0618	2.01183157894754	1260A
42.089	42.108	2.00000000000015	90.28	90.66	0.7381	1.47620000000011	1260A
42.108	42.126	2.11111111111108	90.66	91.04	0.7381	1.55821111111109	1260A
42.126	42.144	2.55555555555542	91.04	91.5	0.7381	1.88625555555546	1260A
42.144	42.163	2.42105263157912	91.5	91.96	1.0781	2.61013684210545	1260A
42.163	42.183	2.49999999999961	91.96	92.46	0.7381	1.84524999999971	1260A
42.183	42.204	2.38095238095229	92.46	92.96	0.7381	1.75738095238089	1260A
42.204	42.229	2.40000000000017	92.96	93.56	0.9315	2.23560000000016	1260A
42.229	42.255	2.5384615384612	93.56	94.22	0.7381	1.87363846153821	1260A
42.255	42.275	3.00000000000057	94.22	94.82	1.0852	3.25560000000062	1260A
42.275	42.296	2.76190476190472	94.82	95.4	0.7381	2.03856190476187	1260A
42.296	42.317	2.57142857142844	95.4	95.94	0.7381	1.89797142857133	1260A
42.317	42.346	1.79310344827607	95.94	96.46	0.7381	1.32348965517257	1260A
42.346	42.367	2.38095238095229	96.46	96.96	0.9466	2.25380952380944	1260A
42.367	42.409	1.04761904761904	96.96	97.4	0.7381	0.773247619047611	1260A
42.409	42.428	2.63157894736865	97.4	97.9	0.7381	1.9423684210528	1260A
42.428	42.443	2.39999999999991	97.9	98.26	0.8511	2.04263999999992	1260A
42.443	42.461	2.44444444444434	98.26	98.7	0.7381	1.80424444444437	1260A
42.461	42.482	2.38095238095229	98.7	99.2	0.7381	1.75738095238089	1260A
42.482	42.501	2.42105263157912	99.2	99.66	0.7381	1.78697894736855	1260A
42.501	42.518	2.3529411764702	99.66	100.06	0.9166	2.15670588235259	1260A
42.518	42.535	2.47058823529472	100.06	100.48	0.7381	1.82354117647103	1260A
42.535	42.556	2.38095238095229	100.48	100.98	0.7381	1.75738095238089	1260A
42.556	42.577	2.76190476190465	100.98	101.56	1.0111	2.79256190476179	1260A
42.577	42.598	2.76190476190465	101.56	102.14	0.7381	2.03856190476182	1260A
42.598	42.624	1.99999999999973	102.14	102.66	0.8229	1.64579999999978	1260A
42.624	42.647	2.5217391304352	102.66	103.24	0.7381	1.86129565217422	1260A
42.647	42.669	3.00000000000026	103.24	103.9	0.7381	2.21430000000019	1260A
42.669	42.69	1.99999999999986	103.9	104.32	0.8699	1.73979999999988	1260A
42.69	42.713	1.73913043478239	104.32	104.72	0.7381	1.28365217391288	1260A
42.713	42.736	5.0434782608704	104.72	105.88	0.7381	3.72259130434844	1260A
42.736	42.759	2.34782608695622	105.88	106.42	0.8973	2.10670434782581	1260A
42.759	42.781	2.27272727272743	106.42	106.92	0.7381	1.67750000000012	1260A
42.781	42.804	2.26086956521706	106.92	107.44	0.7381	1.66874782608671	1260A
42.804	42.826	2.36363636363651	107.44	107.96	0.7381	1.74460000000011	1260A
42.826	42.849	2.52173913043526	107.96	108.54	0.8909	2.24661739130477	1260A
42.849	42.872	2.69565217391262	108.54	109.16	0.7381	1.98966086956491	1260A
42.872	42.898	2.38461538461509	109.16	109.78	0.8341	1.98900769230745	1260A
42.898	42.92	2.72727272727289	109.78	110.38	0.7381	2.01300000000012	1260A
42.92	42.939	2.63157894736865	110.38	110.88	0.7381	1.9423684210528	1260A
42.939	42.954	3.99999999999991	110.88	111.48	0.9959	3.98359999999991	1260A
42.954	42.974	3.60000000000071	111.48	112.2	0.7381	2.65716000000052	1260A
42.974	42.996	3.13636363636283	112.2	112.89	0.9486	2.97515454545378	1260A
42.996	43.017	3.57142857142844	112.89	113.64	0.7381	2.63607142857133	1260A
43.017	43.039	2.81818181818204	113.64	114.26	0.9244	2.60512727272747	1260A
43.039	43.065	3.00000000000044	114.26	115.04	0.7381	2.21430000000032	1260A
43.065	43.087	1.90909090909037	115.04	115.46	0.7381	1.4090999999996	1260A
43.087	43.109	3.18181818181842	115.46	116.16	0.8754	2.78536363636384	1260A
43.109	43.13	3.04761904761893	116.16	116.8	0.7381	2.24944761904754	1260A
43.13	43.151	3.33333333333322	116.8	117.5	0.7381	2.46033333333325	1260A
[truncated: 5,520 more rows]
